# Supplementary material for: Maternal emotional and physical intimate partner violence and early child development: investigating mediators in a cross-sectional study in a South African birth cohort
Source: PubMed Central journal article supplement (PMC8557296; doi:10.1136/bmjopen-2020-046829), 2021-10-28
Supplement: bmjopen-2020-046829.draft_revisions.pdf [file bmjopen-2020-046829.draft_revisions.pdf]

# BMJ Open

BMJ Open is committed to open peer review. As part of this commitment we make the peer review history of every article we publish publicly available.

When an article is published we post the peer reviewers' comments and the authors' responses online. We also post the versions of the paper that were used during peer review. These are the versions that the peer review comments apply to.

The versions of the paper that follow are the versions that were submitted during the peer review process. They are not the versions of record or the final published versions. They should not be cited or distributed as the published version of this manuscript.

BMJ Open is an open access journal and the full, final, typeset and author-corrected version of record of the manuscript is available on our site with no access controls, subscription charges or pay-per-view fees (<http://bmjopen.bmj.com>).

If you have any questions on BMJ Open's open peer review process please email [info.bmjopen@bmj.com](mailto:info.bmjopen@bmj.com)

# BMJ Open

## Maternal emotional and physical intimate partner violence and early child development: investigating mediators in a cross sectional study in a South African birth cohort.

|                               |                                                                                                                                                                                                                                                                                                                                                                                                                                                                                                                                                                                                                                                                                                                                                                                                                                                                                                                                                                                                                                                                                                                                                                                                                                                                                                                                                                                                                                                                                                                                                                                                                                                                                                                                                                                                                                                                                                                                           |
|-------------------------------|-------------------------------------------------------------------------------------------------------------------------------------------------------------------------------------------------------------------------------------------------------------------------------------------------------------------------------------------------------------------------------------------------------------------------------------------------------------------------------------------------------------------------------------------------------------------------------------------------------------------------------------------------------------------------------------------------------------------------------------------------------------------------------------------------------------------------------------------------------------------------------------------------------------------------------------------------------------------------------------------------------------------------------------------------------------------------------------------------------------------------------------------------------------------------------------------------------------------------------------------------------------------------------------------------------------------------------------------------------------------------------------------------------------------------------------------------------------------------------------------------------------------------------------------------------------------------------------------------------------------------------------------------------------------------------------------------------------------------------------------------------------------------------------------------------------------------------------------------------------------------------------------------------------------------------------------|
| Journal:                      | <i>BMJ Open</i>                                                                                                                                                                                                                                                                                                                                                                                                                                                                                                                                                                                                                                                                                                                                                                                                                                                                                                                                                                                                                                                                                                                                                                                                                                                                                                                                                                                                                                                                                                                                                                                                                                                                                                                                                                                                                                                                                                                           |
| Manuscript ID                 | bmjopen-2020-046829                                                                                                                                                                                                                                                                                                                                                                                                                                                                                                                                                                                                                                                                                                                                                                                                                                                                                                                                                                                                                                                                                                                                                                                                                                                                                                                                                                                                                                                                                                                                                                                                                                                                                                                                                                                                                                                                                                                       |
| Article Type:                 | Original research                                                                                                                                                                                                                                                                                                                                                                                                                                                                                                                                                                                                                                                                                                                                                                                                                                                                                                                                                                                                                                                                                                                                                                                                                                                                                                                                                                                                                                                                                                                                                                                                                                                                                                                                                                                                                                                                                                                         |
| Date Submitted by the Author: | 12-Nov-2020                                                                                                                                                                                                                                                                                                                                                                                                                                                                                                                                                                                                                                                                                                                                                                                                                                                                                                                                                                                                                                                                                                                                                                                                                                                                                                                                                                                                                                                                                                                                                                                                                                                                                                                                                                                                                                                                                                                               |
| Complete List of Authors:     | <p>Barnett, Whitney; University of Cape Town Faculty of Health Sciences, Department of Paediatrics and Child Health &amp; South African Medical Research Council Unit on Child &amp; Adolescent Health</p> <p>Halligan, Sarah; University of Bath, Department of Psychology;</p> <p>University of Cape Town Faculty of Health Sciences, Department of Psychiatry and Mental Health &amp; South African Medical Research Council Unit on Risk and Resilience in Mental Disorders</p> <p>Wedderburn, Catherine; London School of Hygiene &amp; Tropical Medicine, Department of Clinical Research; University of Cape Town, Department of Paediatrics and Child Health &amp; South African Medical Research Council Unit on Child &amp; Adolescent Health</p> <p>MacGinty, Rae; University of Cape Town Faculty of Health Sciences, Department of Paediatrics and Child Health &amp; South African Medical Research Council Unit on Child &amp; Adolescent Health</p> <p>Hoffman, Nadia; University of Cape Town Faculty of Health Sciences, Department of Psychiatry and Mental Health &amp; South African Medical Research Council Unit on Risk and Resilience in Mental Disorders</p> <p>Zar, Heather; University of Cape Town Faculty of Health Sciences, Department of Paediatrics and Child Health &amp; South African Medical Research Council Unit on Child &amp; Adolescent Health</p> <p>Stein, Dan; University of Cape Town Faculty of Health Sciences, Department of Psychiatry and Mental Health &amp; South African Medical Research Council Unit on Risk and Resilience in Mental Disorders;</p> <p>University of Cape Town Faculty of Health Sciences, Neuroscience Institute</p> <p>Donald, Kirsten; University of Cape Town Faculty of Health Sciences, Division of Developmental Paediatrics, Department of Paediatrics and Child Health; University of Cape Town Faculty of Health Sciences, Neuroscience Institute</p> |
| Keywords:                     | Developmental neurology & neurodisability < PAEDIATRICS, PUBLIC HEALTH, TRAUMA MANAGEMENT                                                                                                                                                                                                                                                                                                                                                                                                                                                                                                                                                                                                                                                                                                                                                                                                                                                                                                                                                                                                                                                                                                                                                                                                                                                                                                                                                                                                                                                                                                                                                                                                                                                                                                                                                                                                                                                 |
|                               |                                                                                                                                                                                                                                                                                                                                                                                                                                                                                                                                                                                                                                                                                                                                                                                                                                                                                                                                                                                                                                                                                                                                                                                                                                                                                                                                                                                                                                                                                                                                                                                                                                                                                                                                                                                                                                                                                                                                           |

SCHOLARONE™  
Manuscripts

1  
2  
3  
4  
5  
6  
7  
8  
9  
10  
11  
12  
13  
14  
15  
16  
17  
18  
19  
20  
21  
22  
23  
24  
25  
26  
27  
28  
29  
30  
31  
32  
33  
34  
35  
36  
37  
38  
39  
40  
41  
42  
43  
44  
45  
46  
47  
48  
49  
50  
51  
52  
53  
54  
55  
56  
57  
58  
59  
60

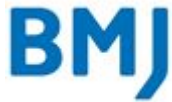

I, the Submitting Author has the right to grant and does grant on behalf of all authors of the Work (as defined in the below author licence), an exclusive licence and/or a non-exclusive licence for contributions from authors who are: i) UK Crown employees; ii) where BMJ has agreed a CC-BY licence shall apply, and/or iii) in accordance with the terms applicable for US Federal Government officers or employees acting as part of their official duties; on a worldwide, perpetual, irrevocable, royalty-free basis to BMJ Publishing Group Ltd ("BMJ") its licensees and where the relevant Journal is co-owned by BMJ to the co-owners of the Journal, to publish the Work in this journal and any other BMJ products and to exploit all rights, as set out in our [licence](#).

The Submitting Author accepts and understands that any supply made under these terms is made by BMJ to the Submitting Author unless you are acting as an employee on behalf of your employer or a postgraduate student of an affiliated institution which is paying any applicable article publishing charge ("APC") for Open Access articles. Where the Submitting Author wishes to make the Work available on an Open Access basis (and intends to pay the relevant APC), the terms of reuse of such Open Access shall be governed by a Creative Commons licence – details of these licences and which [Creative Commons](#) licence will apply to this Work are set out in our licence referred to above.

Other than as permitted in any relevant BMJ Author's Self Archiving Policies, I confirm this Work has not been accepted for publication elsewhere, is not being considered for publication elsewhere and does not duplicate material already published. I confirm all authors consent to publication of this Work and authorise the granting of this licence.

1  
2  
3 Maternal emotional and physical intimate partner violence and early child development:  
4 investigating mediators in a cross sectional study in a South African birth cohort.  
5  
6

7 Whitney Barnett<sup>a</sup>, Sarah L Halligan<sup>b,c</sup>, Catherine J Wedderburn<sup>a,d</sup>, Rae MacGinty<sup>a</sup>, Nadia  
8 Hoffman<sup>c</sup>, Heather J. Zar<sup>a</sup>, Dan J. Stein<sup>c,e</sup>, Kirsten A Donald<sup>e,f</sup>  
9

10 <sup>a</sup> Department of Paediatrics and Child Health & South African Medical Research Council  
11 Unit on Child & Adolescent Health, University of Cape Town, South Africa; <sup>b</sup> Department of  
12 Psychology, University of Bath, United Kingdom; <sup>c</sup> Department of Psychiatry and Mental  
13 Health & South African Medical Research Council Unit on Risk and Resilience in Mental  
14 Disorders, University of Cape Town, South Africa; <sup>d</sup> Department of Clinical Research,  
15 London School of Hygiene & Tropical Medicine, London, UK; <sup>e</sup> Neuroscience Institute,  
16 University of Cape Town, South Africa <sup>f</sup> Division of Developmental Paediatrics, Department  
17 of Paediatrics & Child Health, University of Cape Town, South Africa  
18  
19

20  
21 **Corresponding author:**

22 Whitney Barnett  
23 Department of Paediatrics and Child Health  
24 Unit B11, REACH Center  
25 Red Cross War Memorial Children's Hospital  
26 Cape Town, South Africa  
27 [barnett.whitney@gmail.com](mailto:barnett.whitney@gmail.com)  
28 Tel: +27 (0) 790432604  
29

30  
31 **Key words:** toddler development, intimate partner violence, LMIC, IPV, child development  
32

33 **Word count:** 4,080  
34

35 **Funding**

36 The study was funded by the Bill and Melinda Gates Foundation [OPP 1017641]. Additional  
37 support for HJZ and DJS is from the SA MRC. Additional aspects of the work reported here  
38 are supported by an Academy of Medical Sciences Newton Advanced Fellowship  
39 (NAF002\1001), funded by the UK Government's Newton Fund, by the UK MRC  
40 (MR/T002816/1) and by the US Brain and Behaviour Foundation Independent Investigator  
41 grant (24467). WB is supported by the SAMRC, through its Division of Research Capacity  
42 Development under the Bongani Mayosi National Health Scholars programme. CJW was  
43 supported by the Wellcome Trust through a Research Training Fellowship [203525/Z/16/Z].  
44

45 **Acknowledgements**

46  
47 We thank the study staff in Paarl, the study data team and lab teams, the clinical and  
48 administrative staff of the Western Cape Government Health Department at Paarl Hospital  
49 and at the clinics for support of the study. We thank the families and children who  
50 participated in this study.  
51  
52  
53  
54  
55  
56  
57  
58  
59  
60

## Abstract

**Objectives:** This study investigated associations between recent maternal intimate partner violence (emotional, physical and sexual) and child development at 2 years as well as whether maternal depression or alcohol use mediated these relationships.

**Design:** Cross sectional study nested in a South African birth cohort.

**Setting:** Two primary care clinics in Paarl, South Africa.

**Participants:** 626 mother-child pairs; inclusion criteria for maternal antenatal enrolment were clinic attendance and remaining in the study area for at least 1 year; women were excluded if a minor.

**Primary outcome measures:** Child cognitive, language and motor development composite scores. These were assessed using the Bayley Scales of Infant and Toddler Development, 3<sup>rd</sup> edition (BSID-III).

**Results:** Emotional IPV was associated with lower cognitive ( $\beta=-0.32$ ; 95%CI -0.60,-0.04), language ( $\beta=-0.36$ ; 95%CI -0.69,-0.01) or motor composite scores ( $\beta=-0.58$ ; 95%CI -0.95,-0.20) in children at 2 years of age. Physical IPV was associated with lower motor scores ( $\beta=-0.42$ ; 95%CI -0.75,-0.09) at 2 years. Sexual IPV was unrelated to developmental outcomes, possibly due to low prevalence. Neither recent maternal depression nor alcohol use were shown to mediate the relationship between IPV and developmental outcomes.

**Conclusions:** Interventions to reduce maternal IPV, including emotional IPV, and early-life interventions for infants and toddlers are needed to promote optimal child development.

### Strengths and limitations of this study

- This study investigates the impact of multiple types of IPV (emotional, physical and sexual) on developmental outcomes in very young children in a high-risk setting.
- Understanding the factors underlying associations between IPV and poor child development is critical to better inform interventions and policy, thus we investigated both maternal postnatal depression and alcohol use as potential mediators of IPV-child development relationships in this cohort.
- The current study used cross sectional data and therefore did not investigate longitudinal exposures and cannot assert causality, however, results highlight the potential importance of IPV exposure during a developmentally sensitive period.

## Background

Intimate partner violence (IPV) is one of the most common forms of violence against women. The World Health Organization's multicountry study on violence against women found high lifetime prevalence of physical IPV (up to 61%), sexual IPV (up to 59%) and emotional IPV (up to 75%).<sup>1</sup> The epidemic of IPV is particularly marked in low-and-middle-income countries (LMICs), including South Africa, where prevalence is amongst the highest globally.<sup>2,3</sup> Children in households with IPV are often witnesses and are at increased risk for abuse or neglect.<sup>4</sup> The United Nations estimates that each year between 133–275 million children witness violence between primary caregivers.<sup>5</sup> Exposure to violence in the home is linked to many adverse health outcomes in children, including developmental, psychological and behavioural impairments.<sup>6-8</sup> Importantly, these often impact health and development beyond childhood, having negative effects that extend into adolescence and adulthood.<sup>6,9,10</sup> However, there remain several gaps in the existing literature.

Relatively little research has examined associations between the presence of IPV and poorer cognitive, language and motor development in infancy and very early childhood<sup>11-13</sup> though it is a critical developmental period that can have significant implications for long-term health.<sup>14</sup> Where data are available, exposure to IPV in the first two years of life has been associated with increased risk of developmental delay.<sup>12,13</sup> Healthy development during the first years of life is vital, given its impact on academic performance and mental health across the lifespan.<sup>10,14</sup> Indeed, a longitudinal study through 8 years found that exposure to interpersonal trauma (maltreatment and/or witnessing IPV) in the first two years of life was associated with the poorest cognitive outcomes compared to other periods in childhood.<sup>15</sup>

1  
2  
3 Research focusing on child development and IPV often narrowly defines IPV  
4  
5 as only physical or sexual abuse, though emotional IPV has been linked to similar or  
6  
7 increased rates of ill-health, both physical and mental, compared to physical IPV.<sup>16-19</sup>  
8  
9 Additionally, the majority of studies, particularly in school-aged children, have been  
10  
11 done in high income countries (HICs), though LMICs have a higher burden of IPV-  
12  
13 associated risk factors, such as community violence, trauma, substance use disorders  
14  
15 and mental illness and limited support networks. South Africa in particular has among  
16  
17 the highest burdens of interpersonal violence in the world.<sup>20</sup> The roots of high levels of  
18  
19 violence can be linked to South Africa's colonial and apartheid past, including the  
20  
21 impacts of systemic racism, impoverishment, migrant labour, gender norms and  
22  
23 constructions of masculinity.<sup>21</sup> Zembe and colleagues investigated social risk factors  
24  
25 and relationship power inequity and IPV in a South African sample, finding high  
26  
27 acceptability of violence in intimate relationships as well as gender norms supporting  
28  
29 aggressive masculinity and subservient femininity, particularly in historically  
30  
31 marginalized groups such as those included in the present study.<sup>22</sup>  
32  
33  
34  
35  
36  
37

38 Lastly, a key gap in the existing literature examining associations between IPV  
39  
40 exposure and early life child developmental outcomes is investigation of potential  
41  
42 mediators in this relationship, particularly in LMIC settings. Several potential  
43  
44 mechanisms underlying the relationship between IPV and child development have been  
45  
46 proposed. For instance, maternal depression as well as alcohol use have been separately  
47  
48 linked to both IPV and development outcomes,<sup>13,19</sup> potentially compromising maternal-  
49  
50 child attachment, impacting maternal autonomy and caregiving, diverting financial  
51  
52 resources in the home and may increase the risk of child maltreatment or abuse.<sup>23</sup>  
53  
54 Alcohol is one of the most commonly misused substances, with extremely high  
55  
56 prevalence of alcohol use disorders in South Africa,<sup>24</sup> and maternal use postnatally is  
57  
58  
59  
60



1  
2  
3 associated with poorer child development and academic performance.<sup>25-27</sup> Maternal  
4 depression has been linked to insecure mother-child attachment,<sup>28</sup> less sensitive and  
5 responsive caregiving,<sup>29</sup> and reduced health care service utilization<sup>30</sup> adversely  
6 impacting care and stimulation needed for healthy development. Although there is  
7 evidence linking proposed mediators to both IPV and early-life development, extremely  
8 few have formally investigated potential explanatory factors.<sup>31</sup>  
9  
10  
11  
12  
13  
14  
15

16  
17 This study aims to explore associations between IPV sub-types (emotional,  
18 physical and sexual) and child development (cognitive, language and motor) at two  
19 years of age and to investigate potential mechanisms underlying this relationship. The  
20 current study addresses three key gaps in the literature, specifically by (i) investigating  
21 associations between IPV and development in very young children (ii) investigating the  
22 differential impact of sub-types of IPV and (iii) investigating maternal depression or  
23 alcohol use as potential mediators in these relationships. Given the high prevalence of  
24 IPV in low resource settings, understanding the significant impact IPV exposure may  
25 have on young children during this developmentally sensitive period and improved  
26 understanding of possible pathways underlying these relationships is important for  
27 improving child potential globally.<sup>11</sup>  
28  
29  
30  
31  
32  
33  
34  
35  
36  
37  
38  
39  
40  
41  
42  
43  
44

## 45 **Methods**

46  
47 The parent study is a longitudinal, population-based birth cohort study  
48 following mother-child dyads from pregnancy through childhood.<sup>32-34</sup> The study is  
49 located in a periurban area in South Africa, characterised by low socioeconomic status  
50 (SES) and psychosocial risk factors. There is a free primary health care system, that  
51 includes antenatal and child health services. The current cross sectional analysis uses  
52 data from three study visits occurring at or near 2 years of child age.  
53  
54  
55  
56  
57  
58  
59  
60

### *Participants*

Pregnant women were enrolled from March 2012 to March 2015. Women were enrolled in their second trimester, between 20 and 28 weeks' gestation at two public sector primary healthcare clinics, one serving a predominantly mixed-ancestry population and the other serving a predominantly Black African population. Our intention in using the historic terms of *Black African* and *mixed ancestry* is not meant to reify these terms, but to contribute to the literature on ongoing health disparities. Inclusion criteria were: (1) pregnant women attending one of the two study clinics; (2) aged 18 years or older; and (3) intending to remain in the study area for at least 1 year.

### *Ethical considerations*

Ethical approval was obtained from the Faculty of Health Sciences Research Ethics Committee, University of Cape Town (401/2009) and the Western Cape Provincial Research committee. Mothers gave written informed consent at enrolment and were re-consented annually thereafter. Study staff were trained in ethical conduct of violence and mental health research, including confidentiality, and identification and management of risk. Interviews were conducted privately, data were de-identified and only accessible to study staff to ensure confidentiality. Where significant mental health issues or safety concerns were identified, staff referred participants to appropriate care or social services (including support services for IPV, substance abuse and mental health issues).

### *Clinical and sociodemographic data*

Sociodemographic information was collected from the mother at a visit two years after their child's birth, using a standardized questionnaire adapted from items included in the South African Stress and Health Study.<sup>35</sup> Maternal education (any secondary versus completed secondary), employment and partnership status (single or married/marriage-like relationship) and household income [ $<R,1000$ /month (60USD), R1,000 to R5000 (350USD) or  $>R5,000$ /month] were self-reported at 2 years postpartum. Maternal HIV status during pregnancy was confirmed by routine testing during antenatal care. All HIV-exposed children were tested per the Western Cape prevention of mother-to-child transmission guidelines.<sup>36</sup> Birthweight and postnatal anthropometric measurements were collected by trained staff at birth and 2 years, as has been described.<sup>37</sup>

### *Intimate partner violence*

Recent maternal IPV was measured at 2 years postpartum using the Intimate Partner Violence Questionnaire (IPVQ), a 12-item inventory adapted from the WHO multicountry study<sup>38</sup> and the Women's Health Study in Zimbabwe.<sup>39</sup> The IPVQ assessed recent (past-year) exposure to emotional (4 of 12 questionnaire items), physical (5 of 12 items), and sexual abuse (3 of 12 items). Partner behavior indicating emotional IPV included having been insulted or made to feel bad, having been humiliated in front of others, intentionally scared or intimidated or threatened with physical harm. Physical IPV included being slapped, pushed, shoved, hit with an object, beaten or choked. Sexual IPV exposure was classified based on having been forced to have sex, afraid not to have sex or forced to do something sexual which was degrading or humiliating. Mothers were asked about frequency of exposure to partner

1  
2  
3 behavior (“never”, “once”, “a few times” or “many times”). Items were then summed  
4  
5 to create scores for each IPV sub-type with higher scores indicating greater severity  
6  
7 and frequency of exposure; exposure was defined as a score >1 indicating more than  
8  
9 an isolated incident within each subtype. Scoring guidelines were devised for the  
10  
11 purposes of this study, and were based on prior work in South Africa.<sup>40</sup>  
12  
13  
14  
15  
16

### 17 *Proposed mediating variables*

18  
19 Recent maternal depression was measured using the Beck Depression Inventory  
20  
21 (BDI), a validated and reliable screening tool for depressive symptoms at 2 years post-  
22  
23 partum.<sup>41,42</sup> The BDI-II comprises 21 items, which assesses severity of symptoms of  
24  
25 major depression on a severity scale from 0 (absence of symptoms) to 3 (severe).  
26  
27 Individual items are summed to obtain a total score, with higher scores indicating more  
28  
29 severe depressive symptoms. A cut off score of  $\geq 20$  was used to indicate participants  
30  
31 with probable depression.<sup>43</sup> The Alcohol, Smoking and Substance Involvement Screen  
32  
33 Test (ASSIST) was used to measure current maternal alcohol-related risk at 2 years of  
34  
35 child age.<sup>44</sup> Alcohol related items were summed to create a score for alcohol-related  
36  
37 problems with higher scores indicating greater substance-related risk. We used  
38  
39 published guidelines for the ASSIST to classify alcohol scores into three categories for  
40  
41 descriptive purposes: low/no risk (0-10), moderate risk (11-26) and high risk (>26),  
42  
43 with the likelihood of alcohol dependence.<sup>45</sup>  
44  
45  
46  
47  
48  
49  
50

### 51 *Bayley Scales of Infant and Toddler Development, 3<sup>rd</sup> edition (BSID-III)*

52  
53 The Bayley Scales of Infant and Toddler Development, third edition (BSID-  
54  
55 III)<sup>46</sup> was used to measure toddler neurodevelopment. It is widely used to assess  
56  
57 development in children ages 2 to 42 months and has been validated for use in South  
58  
59  
60

1  
2  
3 Africa.<sup>47</sup> Assessments for neurodevelopment were done at 2 years of child age by  
4 trained physiotherapists and occupational therapists supervised by a paediatric  
5 neurodevelopmental specialist.<sup>34</sup> Quality control and monitoring processes were  
6 implemented to ensure accuracy. Assessments were conducted with language prompts  
7 in the child's preferred language and assessors alternated between sites and assessed a  
8 similar number of children. In the current study, composite scores for cognition,  
9 language and motor development were used. The composite scores are calculated using  
10 a normal US population, and are standardised to have a mean of 100 and standard  
11 deviation of 15. Composite scores are strongly correlated to raw scores in the current  
12 study and allow comparison across domains. Continuous composite scores as well as  
13 categorical outcomes are reported. Categories were defined as 'delay' (<2 standard  
14 deviations below mean), 'suboptimal development' (<1 standard deviation below  
15 mean) and 'no delay'.

### 35 *Patient and public involvement*

36  
37 Investigators have established close relationships with key stakeholders  
38 including Western Cape Government Health Department and community members.  
39  
40 Participants were not involved in the design or recruitment of the DCHS. However,  
41 participant experience and satisfaction have been assessed at multiple time points.<sup>48</sup>  
42  
43 Participant feedback about study experience, information provided and study  
44 procedures have been used ongoing to reassess study protocols and to make  
45 alternations to improve study experience and participant satisfaction. Study findings  
46 are routinely fed back to the community and the Department of Health  
47 clinical and administrative staff.

## Data analysis

The analyses were conducted using STATA 15 (StataCorp Inc., College Station, Texas, USA). Demographic, clinical, psychosocial and child development data were described using median (interquartile range (IQR)) for continuous data or number (%) for categorical data. Developmental data were compared by child sex using Pearson's Chi-square test for categorical data and the Wilcoxon Rank Sum test for continuous data.

Mean composite scores were calculated for the Bayley-III for cognitive, language and motor domains. Birthweight was converted to z-scores based on child sex and gestational age using the INTERGROWTH-21<sup>st</sup> standards<sup>49</sup>. Postnatal weight-for-age z-scores (WFAZ), length-for-age z-scores (LFAZ) and weight-for-length z-scores (WFHZ) were calculated using weight and length measurements at 24 months, using Anthro software (WHO, Geneva, Switzerland)<sup>50</sup>. These as well as emotional, physical and sexual IPV and proposed mediator variables were included as continuous scores in all analyses.

We examined associations using a complete case analysis sample. Bivariate linear regression analyses were used to investigate the relationship between developmental domains, clinical and demographic variables, proposed mediators and IPV sub-types. Regression coefficients with 95% confidence intervals (CIs) are reported. Multivariable linear regression models were then run for each of the developmental (composite cognitive, language and motor scores) outcomes, including significant univariable coefficients ( $p < 0.05$ ). Continuous scores were used for exposure, mediator and outcome data in multivariable models. Where multiple IPV sub-types were significant in bivariate regression, adjusted models were run for each separately, as these were highly correlated. Hypothesized mediators of the relationship

1  
2  
3 between IPV and early life development (current maternal depression and alcohol use)  
4 were investigated. Criteria for formal investigation of potential mediators were 1) their  
5 association with developmental outcomes, using a cut-off level of  $p < 0.05$ , in final  
6 adjusted models (path b) and 2) where associations between IPV and the hypothesized  
7 mediator were significant (path a).  
8  
9

10  
11  
12  
13  
14  
15 In addition to the analysis of observations with complete data, we examined  
16 associations after imputing missing data for covariates and developmental outcomes  
17 using multiple imputation with chained equations (MICE). We assumed covariate data  
18 were missing at random and performed 30 imputations. Results from complete case and  
19 imputed datasets produced similar conclusions. Results based on imputed data are  
20 presented in Supplemental Tables. To explore potential selection bias, we assessed the  
21 characteristics of mother-child dyads with complete and missing data, using Pearson's  
22 Chi-squared and Wilcoxon Rank Sum tests to compare covariate distributions between  
23 groups.  
24  
25  
26  
27  
28  
29  
30  
31  
32  
33  
34  
35  
36  
37

## 38 **Results**

39  
40 Of 1143 study births, 154 (13.5%) children were lost to follow up before  
41 reaching two years of age primarily due to moving out of the study area or being  
42 uncontactable or unavailable for follow up visits. A further 255 (25.8%) did not  
43 complete a BSID-III assessment due to non-attendance on the day or moving out of the  
44 study area. Data for the current study was collected across three visits at approximately  
45 2 years of child age: a clinical visit for growth and sociodemographic data collection; a  
46 psychosocial visit for maternal depression and substance use data and a visit assessing  
47 child development. A total of 626 children who completed the BSID-III assessment and  
48 had IPV exposure and covariate data were included in the final complete case dataset.  
49  
50  
51  
52  
53  
54  
55  
56  
57  
58  
59  
60

1  
2  
3 Comparing the characteristics of dyads with complete and missing exposure or outcome  
4 data, mothers with missing data were less likely to be HIV infected ( $p=0.01$ ) and less  
5 likely to be employed ( $p=0.02$ , Supplemental Table 1).  
6  
7  
8  
9

10 Clinical, demographic, and psychosocial characteristics at two years are  
11 presented in Table 1. This sample was characterized by low maternal employment  
12 (41%), low maternal education (37% completed secondary education), low household  
13 income (only 27% earning more than R5,000 per month [approximately USD 350]).  
14 Almost half of mothers were married or cohabiting (49%) and 24% of children were  
15 HIV exposed with only 2 children HIV-infected. A minority of mothers experienced  
16 psychosocial risk factors or substance use, including emotional IPV (16%), physical  
17 IPV (17%) and sexual IPV (4%), alcohol (10% moderate/high risk), and depression  
18 (11%), Table 1.  
19  
20  
21  
22  
23  
24  
25  
26  
27  
28  
29  
30  
31  
32

### 33 *Developmental outcomes*

34  
35 A total of 28/625 (4%) children were categorised as having cognitive delay ( $<2$   
36 standard deviations below mean), 48/598 (8%) with language delay and 7/592 (1%) with  
37 motor delay. Only language differed significantly by child sex, with males having a  
38 higher prevalence of delay compared to females (10% versus 5%;  $p$  value=0.001) and  
39 lower composite scores ( $p<0.001$ ), Table 2.  
40  
41  
42  
43  
44  
45  
46  
47  
48

### 49 *Intimate partner violence and developmental outcomes*

50  
51 At 24 months, bivariate analysis showed that emotional IPV was associated with  
52 lower composite cognitive scores ( $\beta=-0.32$ ; 95% CI -0.58,-0.06), lower composite  
53 language scores ( $\beta=-0.35$ ; 95% CI -0.69,-0.01) and lower composite motor scores ( $\beta=-$   
54 0.58; 95% CI -0.93,-0.24). Physical IPV was associated with lower composite motor  
55  
56  
57  
58  
59  
60



1  
2  
3 scores ( $\beta=-0.42$ ; 95% CI -0.73,-0.11). Sexual IPV was not associated with any  
4  
5 composite developmental outcomes, Table 3.  
6

7  
8 Multivariable regression models were run to examine associations between IPV  
9  
10 and child developmental outcomes, adjusting for key potential confounding factors. IPV  
11  
12 sub-types were run separately in adjusted models due to collinearity and only where  
13  
14 significant in bivariate analyses. In adjusted models, the results held, recent emotional  
15  
16 IPV was associated with reduced scores across all developmental outcomes, specifically  
17  
18 with lower composite cognitive scores ( $\beta -0.32$ ; 95% CI -0.60,-0.04), language ( $\beta -0.35$ ;  
19  
20 95% CI -0.69, -0.01) and motor scores ( $\beta -0.58$ ; 95% CI -0.95, -0.20). Physical IPV was  
21  
22 associated with lower motor scores ( $\beta -0.42$ ; 95% CI -0.75, -0.09), Table 4. Associations  
23  
24 using the imputed dataset were similar for key exposures (IPV) and outcomes  
25  
26 (developmental), Supplemental Table 2 & 3.  
27  
28  
29  
30  
31  
32

### 33 *Hypothesized mediators*

34  
35 Current maternal depression and alcohol use were explored as potential  
36  
37 mediators in the relationship between recent IPV sub-types and developmental  
38  
39 outcomes. In correlational analyses, both maternal depression and alcohol use were  
40  
41 positively associated with emotional as well as physical IPV (Supplemental Table 4).  
42  
43 However, when linear regressions were run investigating associations between  
44  
45 mediators and developmental outcomes, adjusted for potential confounding factors, we  
46  
47 found no evidence of associations between proposed mediators and each developmental  
48  
49 outcome (cognitive, language, motor), Supplemental Table 5. Therefore, formal  
50  
51 mediation analyses were not done.  
52  
53  
54  
55  
56  
57

## 58 **Discussion**

1  
2  
3 Our results show that recent maternal emotional IPV was associated with lower  
4 cognitive, language and motor scores and physical IPV with lower motor scores in  
5 children at 24 months. Further, we investigated the potential role of current maternal  
6 depression or alcohol use in this relationship. There was insufficient evidence that  
7 current maternal depression or alcohol use were explanatory factors in the relationship  
8 between IPV and child development at 2 years of age.  
9

10  
11 We found associations between emotional IPV and each developmental  
12 outcome investigated, which are novel findings in such young children. Though there  
13 is limited research in this age group, and existing studies use differing definitions of  
14 IPV, a recent study pooling data from 11 LMICs investigating pre-school development  
15 (36-59 months) found associations between all IPV sub-types and developmental  
16 outcomes.<sup>51</sup> Where investigated in a younger sample, studies have found a link between  
17 IPV and early life development. However, few investigated IPV sub-types as separate  
18 risk factors for poor development. For example, a US study, investigating the impact  
19 of IPV on developmental outcomes at two years reported an increased risk of language  
20 and neurological delay in infants and toddlers, however this was not analysed by IPV  
21 sub-type but rather a composite measure of emotional, physical and sexual IPV.<sup>12</sup> A  
22 Tanzanian study through three years of age found both maternal lifetime physical and  
23 lifetime sexual IPV to be associated with reduced motor skills, expressive and receptive  
24 communication and cognitive development.<sup>13</sup> Emotional IPV was not included in their  
25 IPV measure. One study that did investigate emotional IPV separately as a risk factor  
26 for cognitive and language delay, only found associations with postnatal physical IPV  
27 and only in unadjusted analyses. The limited sample size (n=72) may have reduced  
28 statistical power to detect an association.<sup>52</sup> In the current study, sexual IPV was not  
29 associated in unadjusted or adjusted analyses with the outcomes investigated, but this  
30  
31  
32  
33  
34  
35  
36  
37  
38  
39  
40  
41  
42  
43  
44  
45  
46  
47  
48  
49  
50  
51  
52  
53  
54  
55  
56  
57  
58  
59  
60

1  
2  
3 is likely due to insufficient power to detect an association given the relatively low  
4 prevalence of recent sexual IPV in our study population (4%). In the current study,  
5 maternal emotional IPV as compared to physical IPV was more consistently associated  
6 with poorer developmental outcomes. These results indicate that emotional IPV may  
7 carry a unique risk for poor child developmental outcomes in early life in our setting.  
8  
9

10  
11  
12  
13  
14  
15 Given the high prevalence of emotional IPV and that it is often not as readily  
16 recognised or included in research, intervention or policy efforts aimed at prevention  
17 of IPV, it is critical to better understand its distinct impact on child health outcomes.  
18 Our findings suggest that adverse outcomes and their association with maternal IPV  
19 may be underestimated when IPV exposure is not considered broadly and inclusive of  
20 emotional IPV, a potentially significant gap in the literature. Emotional abuse in a  
21 current or past intimate relationships is increasingly being recognized as a unique  
22 contributing factor to maternal ill-health outcomes.<sup>17-19</sup> Specifically, emotional IPV has  
23 been linked to poor mental health, post traumatic stress disorder and poorer physical  
24 health, sometimes above that of physical IPV.<sup>18,53</sup> Psychological control or abuse by a  
25 partner may uniquely impact maternal efficacy, independence and diminish maternal  
26 power within the family, which may affect her ability to provide nutritious food, a  
27 secure environment or to have positive parenting practices, all of which could lead to  
28 increased risk of negative outcomes for her children. These factors may be particularly  
29 influential for health outcomes in settings such as South Africa where entrenched  
30 gender norms and a high acceptability of violence contribute to high levels of IPV.<sup>22</sup>  
31  
32  
33  
34  
35  
36  
37  
38  
39  
40  
41  
42  
43  
44  
45  
46  
47  
48  
49

50  
51 Our investigation of potential mediators found little evidence to support that  
52 current maternal depression symptoms or reported alcohol use were explanatory factors  
53 for the impact of IPV on child development at two years. In the parent study we have  
54 previously found that IPV is linked to longitudinal maternal depression<sup>19</sup> as well as  
55  
56  
57  
58  
59  
60

1  
2  
3 hazardous alcohol use in pregnancy.<sup>54</sup> In the current study, we found that IPV was  
4 associated with depression and alcohol use at 2 years. However, these did not appear to  
5 be associated with development at 2 years. Recent maternal depression or alcohol use  
6 may compromise the quality of parenting or parent-child attachment, may divert  
7 household financial resources and decrease maternal care-seeking behaviours, which in  
8 turn may compromise child development. Though there is much literature linking  
9 maternal substance use to adverse child outcomes, some studies that have investigated  
10 its impact on parenting or secure attachment have found mixed results.<sup>55,56</sup> For example,  
11 a study assessing maternal substance use and quality of caregiving found no differences  
12 between substance abusing and non-substance abusing mothers and caregiving or  
13 maternal-child attachment at 12 months.<sup>55</sup> Similarly, studies investigating maternal  
14 depression and child development have shown mixed findings.<sup>13,57,58</sup> A Tanzanian  
15 study investigating depression and toddler development, found that depression was  
16 associated with receptive language and motor development but not cognitive or  
17 expressive language.<sup>13</sup> Another study found that maternal depression at 7 weeks  
18 postpartum impacted development at 3 months but this relationship attenuated by 6  
19 months.<sup>57</sup> Our findings may be influenced by relatively low levels of probable clinical  
20 depression (11%) or moderate-high alcohol-related risk (10%), diluting possible  
21 associations. We found no evidence that recent maternal depression or alcohol use  
22 influenced the relationship between IPV and early life development; these findings may  
23 illustrate the complexity of the relationship between the factors explored and other  
24 adverse environmental risks which often co-occur and may be underlying these  
25 relationships.

26  
27  
28  
29  
30  
31  
32  
33  
34  
35  
36  
37  
38  
39  
40  
41  
42  
43  
44  
45  
46  
47  
48  
49  
50  
51  
52  
53  
54  
55  
56 The prospective nature of the parent study, including measurement of a broad  
57 range of risk factors and robust measurement of developmental outcomes in an LMIC  
58  
59  
60

1  
2  
3 setting, is a strength of this study. However, there are several limitations. The current  
4  
5 study used cross sectional data, therefore we cannot assert causality. Maternal sexual  
6  
7 IPV prevalence was very low in our sample (4%) and this likely affected power to  
8  
9 discern potential associations. We also did not investigate longitudinal exposures or  
10  
11 cumulative impact of maternal depression or alcohol use; these were only investigated  
12  
13 as recent exposures. Further, although the BSID-III is a well recognised tool, further  
14  
15 standardisation in sub-Saharan African settings is required. For example, the  
16  
17 categorisation of delay is based on scaled scores using normative US data that might  
18  
19 not be generalisable to a South African population. However, our data from the parent  
20  
21 study has shown that raw scores have similar patterns to the results based on delay  
22  
23 categorisation. There were some differences in characteristics of those included versus  
24  
25 excluded in the present study, namely HIV exposure and maternal employment.  
26  
27 Maternal employment was lower in the included sub-sample (41% vs 51%), however,  
28  
29 household income was similar across groups. Furthermore, maternal employment was  
30  
31 not associated with any outcomes investigated in bivariate analyses and adjustment for  
32  
33 this did not alter any of the key associations. HIV exposure was higher in the included  
34  
35 sub-sample (24% versus 18%), however, this would likely bolster potential  
36  
37 associations. In addition, approximately one-third of children who were still active in  
38  
39 the study at two years were not included in the analysis due to incomplete data.  
40  
41 However, results were similar when associations were explored in the imputed dataset.  
42  
43  
44  
45  
46  
47  
48  
49  
50

### 51 *Conclusions*

52  
53 In summary, our results highlight the need for programs that aim to reduce IPV  
54  
55 as well as early life prevention efforts to mitigate the impact of maternal IPV on  
56  
57 children. Maternal IPV was a consistent predictor of poor child developmental  
58  
59  
60

1  
2  
3 outcomes; furthermore, emotional IPV emerged as a uniquely deleterious risk factor  
4 for child developmental outcomes. Further work is needed to understand the  
5 mechanisms underlying this relationship, exploring maternal depression and alcohol  
6 use in other samples as well as additional potential mechanisms. Given our findings, it  
7 is important for public health professionals and policy makers to ensure that maternal  
8 emotional IPV is included in training programs for health care staff as well as in  
9 screening and referral efforts. Lastly, more research investigating emotional or  
10 psychological IPV and adverse health outcomes is needed. Critically, in our setting, the  
11 majority of pregnant and early postpartum women access healthcare, providing an  
12 important, potentially under-utilized opportunity to intervene early to attempt to shield  
13 children from the negative effects of IPV.  
14  
15  
16  
17  
18  
19  
20  
21  
22  
23  
24  
25  
26  
27  
28  
29

### 30 *Data sharing*

31  
32 Collaborations for the analysis of data are welcome; the parent study has a large  
33 and active group of investigators and postgraduate students and many have successfully  
34 partnered with students or researchers from other institutions. Researchers who are  
35 interested in datasets or collaborations can find more information on our website  
36 [http://www.paediatrics.uct.ac.za/scah/dclhs].  
37  
38  
39  
40  
41  
42  
43  
44  
45

### 46 *Competing interests*

47  
48 The authors have no conflicts of interest to declare.  
49  
50

### 51 *Author contributions*

52  
53  
54 WB, KD and SH conceptualized the study aims and methodology. WB with guidance  
55 from RM, conducted all analyses. HJZ is principal investigator of the parent study; DS  
56 leads the psychosocial study aspects; CW and KD are coinvestigators and were  
57  
58  
59  
60

1  
2  
3 responsible for implementation, training and quality control of developmental  
4  
5 assessments. All authors provided intellectual input and reviewed and approved the  
6  
7 final manuscript.  
8  
9

## 10 References

- 11
- 12 1. Garcia-Moreno C, Jansen HA, Ellsberg M, Heise L, Watts CH. Prevalence of  
13 intimate partner violence: findings from the WHO multi-country study on  
14 women's health and domestic violence. *Lancet* 2006; **368**(9543): 1260-9.
- 15 2. Dunkle KL, Jewkes RK, Brown HC, et al. Prevalence and patterns of gender-  
16 based violence and revictimization among women attending antenatal clinics in  
17 Soweto, South Africa. *Am J Epidemiol* 2004; **160**(3): 230-9.
- 18 3. Jewkes R, Penn-Kekana L, Levin J, Ratsaka M, Schriber M. Prevalence of  
19 emotional, physical and sexual abuse of women in three South African  
20 provinces. *S Afr Med J* 2001; **91**(5): 421-8.
- 21 4. Osofsky JD. Prevalence of children's exposure to domestic violence and child  
22 maltreatment: implications for prevention and intervention. *Clin Child Fam*  
23 *Psychol Rev* 2003; **6**(3): 161-70.
- 24 5. Pinheiro, P. S. *World Report on Violence Against Children* (United Nations,  
25 Geneva, 2006). Retrieved 28 Apr 2020, from  
26 [https://www.unicef.org/violencestudy/reports/SG\\_violencestudy\\_en.pdf](https://www.unicef.org/violencestudy/reports/SG_violencestudy_en.pdf).
- 27 6. Kernic MA, Holt VL, Wolf ME, McKnight B, Huebner CE, Rivara FP.  
28 Academic and School Health Issues Among Children Exposed to Maternal  
29 Intimate Partner Abuse. *Arch Pediatr Adolesc Med* 2002; **156**(6): 549-55.
- 30 7. Vu NL, Jouriles EN, McDonald R, Rosenfield D. Children's exposure to  
31 intimate partner violence: A meta-analysis of longitudinal associations with  
32 child adjustment problems. *Clin Psychol Rev* 2016; **46**: 25-33.
- 33 8. Wolfe DA, Crooks CV, Lee V, McIntyre-Smith A, Jaffe PG. The effects of  
34 children's exposure to domestic violence: a meta-analysis and critique. *Clin*  
35 *Child Fam Psychol Rev* 2003; **6**(3): 171-87.
- 36 9. Bair-Merritt MH, Blackstone M, Feudtner C. Physical health outcomes of  
37 childhood exposure to intimate partner violence: a systematic review. *Pediatrics*  
38 2006; **117**(2): e278-90.
- 39 10. Gale CR, Cooper R, Craig L, et al. Cognitive function in childhood and lifetime  
40 cognitive change in relation to mental wellbeing in four cohorts of older people.  
41 *PLoS One* 2012; **7**(9): e44860.
- 42 11. Howell KH, Barnes SE, Miller LE, Graham-Bermann SA. Developmental  
43 variations in the impact of intimate partner violence exposure during childhood.  
44 *J Inj Violence Res* 2016; **8**(1): 43-57.
- 45 12. Udo IE, Sharps P, Bronner Y, Hossain MB. Maternal Intimate Partner Violence:  
46 Relationships with Language and Neurological Development of Infants and  
47 Toddlers. *Matern Child Health J* 2016; **20**(7): 1424-31.
- 48 13. Neamah HH, Sudfeld C, McCoy DC, et al. Intimate Partner Violence,  
49 Depression, and Child Growth and Development. *Pediatrics* 2018; **142**(1).
- 50 14. Shonkoff JP, Garner AS. The lifelong effects of early childhood adversity and  
51 toxic stress. *Pediatrics* 2012; **129**(1): e232-46.  
52  
53  
54  
55  
56  
57  
58  
59  
60



15. Enlow MB, Egeland B, Blood EA, Wright RO, Wright RJ. Interpersonal trauma exposure and cognitive development in children to age 8 years: a longitudinal study. *J Epidemiol Community Health* 2012; **66**(11): 1005-10.
16. Kramer A, Lorenzon D, Mueller G. Prevalence of intimate partner violence and health implications for women using emergency departments and primary care clinics. *Womens Health Issues* 2004; **14**(1): 19-29.
17. Yoshihama M, Horrocks J, Kamano S. The role of emotional abuse in intimate partner violence and health among women in Yokohama, Japan. *Am J Public Health* 2009; **99**(4): 647-53.
18. Coker AL, Davis KE, Arias I, et al. Physical and mental health effects of intimate partner violence for men and women. *Am J Prev Med* 2002; **23**(4): 260-8.
19. Okafor CN, Barnett W, Zar HJ, et al. Associations of Emotional, Physical, or Sexual Intimate Partner Violence and Depression Symptoms Among South African Women in a Prospective Cohort Study. *J Interpers Violence* 2018: 886260518796522.
20. Seedat M, Van Niekerk A, Jewkes R, Suffla S, Ratele K. Violence and injuries in South Africa: prioritising an agenda for prevention. *Lancet* 2009; **374**(9694): 1011-22.
21. Coovadia H, Jewkes R, Barron P, Sanders D, McIntyre D. The health and health system of South Africa: historical roots of current public health challenges. *Lancet* 2009; **374**(9692): 817-34.
22. Zembe YZ, Townsend L, Thorson A, Silberschmidt M, Ekstrom AM. Intimate Partner Violence, Relationship Power Inequity and the Role of Sexual and Social Risk Factors in the Production of Violence among Young Women Who Have Multiple Sexual Partners in a Peri-Urban Setting in South Africa. *PLoS One* 2015; **10**(11): e0139430.
23. Atkinson L, Paglia A, Coolbear J, Niccols A, Parker KC, Guger S. Attachment security: a meta-analysis of maternal mental health correlates. *Clin Psychol Rev* 2000; **20**(8): 1019-40.
24. Myers B. LJ, Fakier N. Access to substance abuse treatment in the Cape Town Metropole: Final report. *South African Medical Research Council* 2007.
25. Jester JM, Jacobson SW, Sokol RJ, Tuttle BS, Jacobson JL. The influence of maternal drinking and drug use on the quality of the home environment of school-aged children. *Alcohol Clin Exp Res* 2000; **24**(8): 1187-97.
26. Jansson LM. Maternal Alcohol Use During Lactation and Child Development. *Pediatrics* 2018; **142**(2).
27. Rochat TJ, Houle B, Stein A, Mitchell J, Bland RM. Maternal alcohol use and children's emotional and cognitive outcomes in rural South Africa. *S Afr Med J* 2019; **109**(7): 526-34.
28. Barnes J, Theule J. Maternal depression and infant attachment security: A meta-analysis. *Infant Ment Health J* 2019; **40**(6): 817-34.
29. National Research Council (US) and Institute of Medicine (US) Committee on Depression, Parenting Practices, and the Healthy Development of Children. *Depression in Parents, Parenting, and Children: Opportunities to Improve Identification, Treatment, and Prevention*. 2009. Retrieved 10 Jul 2020, from: <https://www.ncbi.nlm.nih.gov/books/NBK215128/>.
30. Stein A, Malmberg LE, Sylva K, Barnes J, Leach P. The influence of maternal depression, caregiving, and socioeconomic status in the post-natal year on children's language development. *Child Care Health Dev* 2008; **34**(5): 603-12.



- 1
  - 2
  - 3
  - 4
  - 5
  - 6
  - 7
  - 8
  - 9
  - 10
  - 11
  - 12
  - 13
  - 14
  - 15
  - 16
  - 17
  - 18
  - 19
  - 20
  - 21
  - 22
  - 23
  - 24
  - 25
  - 26
  - 27
  - 28
  - 29
  - 30
  - 31
  - 32
  - 33
  - 34
  - 35
  - 36
  - 37
  - 38
  - 39
  - 40
  - 41
  - 42
  - 43
  - 44
  - 45
  - 46
  - 47
  - 48
  - 49
  - 50
  - 51
  - 52
  - 53
  - 54
  - 55
  - 56
  - 57
  - 58
  - 59
  - 60
31. Kitzmann KM, Gaylord NK, Holt AR, Kenny ED. Child witnesses to domestic violence: a meta-analytic review. *J Consult Clin Psychol* 2003; **71**(2): 339-52.
32. Stein DJ, Koen N, Donald KA, et al. Investigating the psychosocial determinants of child health in Africa: The Drakenstein Child Health Study. *J Neurosci Methods* 2015.
33. Zar HJ, Barnett W, Myer L, Stein DJ, Nicol MP. Investigating the early-life determinants of illness in Africa: the Drakenstein Child Health Study. *Thorax* 2015; **70**(6): 592-4.
34. Donald KA, Hoogenhout M, du Plooy CP, et al. Drakenstein Child Health Study (DCHS): investigating determinants of early child development and cognition. *BMJ Paediatr Open* 2018; **2**(1): e000282.
35. Myer L, Stein DJ, Grimsrud A, Seedat S, Williams DR. Social determinants of psychological distress in a nationally-representative sample of South African adults. *Soc Sci Med* 2008; **66**(8): 1828-40.
36. Pellowski J, Wedderburn C, Stadler JAM, et al. Implementation of prevention of mother-to-child transmission (PMTCT) in South Africa: outcomes from a population-based birth cohort study in Paarl, Western Cape. *BMJ Open* 2019; **9**(12): e033259.
37. Budree S, Stein DJ, Brittain K, et al. Maternal and infant factors had a significant impact on birthweight and longitudinal growth in a South African birth cohort. *Acta Paediatr* 2017; **106**(11): 1793-801.
38. Jewkes R. Intimate partner violence: causes and prevention. *Lancet* 2002; **359**(9315): 1423-9.
39. Shamu S, Abrahams N, Zarowsky C, Shefer T, Temmerman M. Intimate partner violence during pregnancy in Zimbabwe: a cross-sectional study of prevalence, predictors and associations with HIV. *Trop Med Int Health* 2013; **18**(6): 696-711.
40. Dunkle KL, Jewkes RK, Brown HC, Gray GE, McIntryre JA, Harlow SD. Gender-based violence, relationship power, and risk of HIV infection in women attending antenatal clinics in South Africa. *Lancet* 2004.
41. Beck AT, Steer RA, Carbin MG. Psychometric properties of the Beck Depression Inventory: Twenty-five years of evaluation. *Clin Psychol Rev* 1988; **8**(1): 77-100.
42. Kagee A, Nel A, Saal W. Factor structure of the Beck Depression Inventory-II among South Africans receiving antiretroviral therapy. *AIDS Care* 2014; **26**(2): 257-62.
43. Lasa L, Ayuso-Mateos JL, Vázquez-Barquero JL, Díez-Manrique FJ, Dowrick CF. The use of the Beck Depression Inventory to screen for depression in the general population: a preliminary analysis. *J Affect Disord* 2000; **57**(1-3): 261-5.
44. Humeniuk R, Ali R, Babor TF, et al. Validation of the Alcohol, Smoking And Substance Involvement Screening Test (ASSIST). *Addiction* 2008; **103**(6): 1039-47.
45. World Health Organization. 2010. *The Alcohol, Smoking and Substance Involvement Screening Test (ASSIST) Manual for use in primary care*. Retrieved 28 June 2020, from [http://www.who.int/substance\\_abuse/publications/assist/en/](http://www.who.int/substance_abuse/publications/assist/en/).
46. Bayley N. Pearson; Bloomington, MN: 2006. Bayley scales of infant and toddler development, 3rd edition-technical manual.

- 1
  - 2
  - 3
  - 4
  - 5
  - 6
  - 7
  - 8
  - 9
  - 10
  - 11
  - 12
  - 13
  - 14
  - 15
  - 16
  - 17
  - 18
  - 19
  - 20
  - 21
  - 22
  - 23
  - 24
  - 25
  - 26
  - 27
  - 28
  - 29
  - 30
  - 31
  - 32
  - 33
  - 34
  - 35
  - 36
  - 37
  - 38
  - 39
  - 40
  - 41
  - 42
  - 43
  - 44
  - 45
  - 46
  - 47
  - 48
  - 49
  - 50
  - 51
  - 52
  - 53
  - 54
  - 55
  - 56
  - 57
  - 58
  - 59
  - 60
47. Rademeyer V, Jacklin L. A study to evaluate the performance of black South African urban infants on the Bayley Scales of Infant Development III. *SA J Child Health* 2013; **7**: 54-9.
48. Barnett W, Brittain K, Sorsdahl K, Zar HJ, Stein DJ. Maternal participant experience in a South African birth cohort study enrolling healthy pregnant women and their infants. *Philos Ethics Humanit Med* 2016; **11**(1): 3.
49. Villar J, Papageorgiou AT, Pang R, et al. The likeness of fetal growth and newborn size across non-isolated populations in the INTERGROWTH-21st Project: the Fetal Growth Longitudinal Study and Newborn Cross-Sectional Study. *Lancet Diabetes Endocrinol* 2014; **2**(10): 781-92.
50. World Health Organization. 2006. *WHO Child Growth Standards: length/height-for-age, weight-for-age, weight-for-length, weight-for-height and body mass index-for-age: methods and development*. Geneva: World Health Organization. *Acta Paediatr Suppl*, 2006; 450: 76–85.
51. Jeong J, Adhia A, Bhatia A, McCoy DC, Yousafzai AK. Intimate Partner Violence, Maternal and Paternal Parenting, and Early Child Development. *Pediatrics* 2020; **145**(6): e20192955.
52. Rodriguez VJ, Peltzer K, Matseke G, Weiss SM, Shine A, Jones DL. Pre- and postnatal exposure to intimate partner violence among South African HIV-infected mothers and infant developmental functioning at 12 months of age. *Arch Womens Ment Health* 2018; **21**(6): 707-13.
53. Tiwari A, Chan K, Fong D, et al. The impact of psychological abuse by an intimate partner on the mental health of pregnant women. *Bjog* 2008; **115**(3): 377-84.
54. Myers B, Koen N, Donald KA, et al. Effect of Hazardous Alcohol Use During Pregnancy on Growth Outcomes at Birth: Findings from a South African Cohort Study. *Alcohol Clin Exp Res* 2018; **42**(2): 369-77.
55. Bergin C, McCollough P. Attachment in substance-exposed toddlers: The role of caregiving and exposure. *Infant Ment Health J* 2009; **30**(4): 407-23.
56. Eiden RD, Edwards EP, Leonard KE. Mother-infant and father-infant attachment among alcoholic families. *Dev Psychopathol* 2002; **14**(2): 253-78.
57. Galler JR, Harrison RH, Ramsey F, Forde V, Butler SC. Maternal depressive symptoms affect infant cognitive development in Barbados. *J Child Psychol Psychiatry* 2000; **41**(6): 747-57.
58. Morais MdLSe, Lucci TK, Otta E. Postpartum depression and child development in first year of life. *Estudos de Psicologia (Campinas)* 2013; **30**: 7-17.

**Table 1.** Sample maternal and child psychosocial, demographic and clinical characteristics, n=626\*

|                                                      | Total<br>n=626       |
|------------------------------------------------------|----------------------|
| <b>Intimate Partner Violence (24 months)</b>         |                      |
| Emotional score, median (IQR)                        | 0 (0, 0)             |
| Emotional (above threshold)                          | 102 (16)             |
| Physical score, median (IQR)                         | 0 (0, 0)             |
| Physical (above threshold)                           | 107 (17)             |
| Sexual score, median (IQR)                           | 0 (0, 0)             |
| Sexual (above threshold)                             | 25 (4)               |
| Any sub-type score, median (IQR)                     | 0 (0,0)              |
| Any sub-type (above threshold)                       | 138 (22)             |
| <b>Sociodemographics (24 months)</b>                 |                      |
| Maternal education (secondary not completed)         | 233 (37)             |
| Mother employed                                      | 225 (41)             |
| Mother married/partnered                             | 268 (49)             |
| Household Income                                     |                      |
| <R5,000 (approximately 300 USD)                      | 445 (73)             |
| >R5,000                                              | 164 (27)             |
| Recruitment site: TC Newman                          | 274 (440)            |
| <b>Physical variables</b>                            |                      |
| Birth weight z-score, median (IQR)**                 | -0.59 (-1.34, 0.16)  |
| Child age at assessment (months), median (IQR)       | 24.05 (23.79, 24.31) |
| HIV exposed**                                        | 153 (24)             |
| Length for age z-score at 24 months, median (IQR)    | -1.16 (-1.89, -0.52) |
| Weight for age z-score at 24 months, median (IQR)    | -0.31 (-1.10, 0.43)  |
| Weight for length z-score at 24 months, median (IQR) | 0.28 (-0.48, 1.21)   |
| <b>Psychosocial variables (24 months)</b>            |                      |
| Depression score, median (IQR)                       | 0 (0, 3)             |
| Depression (above threshold)                         | 64 (11)              |
| Alcohol dependence score, median (IQR)               | 0 (0, 0)             |
| Alcohol dependence (categories)                      |                      |
| Low/No dependence, n (%)                             | 160 (27)             |
| Moderate dependence, n (%)                           | 33 (6)               |
| High dependence, n (%)                               | 22 (4)               |

Notes: Median (IQR ranges reported for anthropometry data, intimate partner violence scores as well as depression and alcohol scores. Frequencies (percentages) reported for all other variables. Intimate partner violence, above threshold exposure defined as more than an isolated incident within each sub-type. Depression threshold defined as EPDS score of  $\geq 13$ . Alcohol dependence categories defined as: low/no risk (0-10), moderate risk (11-26) and high risk ( $>26$ ), with the likelihood of alcohol dependence.

\*Includes data from mothers or children included in complete case dataset.

\*\*Birthweight and HIV exposure collected at birth; all other variables collected at 2 years of child age.

**Table 2.** Developmental outcomes of children at 2 years of age by child sex

|                               | Total         | Female        | Male          | p-value |
|-------------------------------|---------------|---------------|---------------|---------|
| <i>Sample</i>                 | <i>n=625</i>  | <i>n=303</i>  | <i>n=322</i>  |         |
| Cognitive scores, mean (SD)   | 85.74 (8.84)  | 86.44 (8.56)  | 85.08 (9.06)  | 0.035   |
| Cognitive categories          |               |               |               |         |
| No delay, n (%)               | 425 (68)      | 218 (72)      | 207 (64)      |         |
| Suboptimal development, n (%) | 173 (28)      | 75 (25)       | 98 (30)       |         |
| Delayed, n (%)                | 28 (4)        | 10 (3)        | 18 (6)        | 0.082   |
| <i>Sample</i>                 | <i>n=598</i>  | <i>n=289</i>  | <i>n=309</i>  |         |
| Language scores, mean (SD)    | 84.45 (11.39) | 86.57 (11.35) | 82.47 (11.08) | <0.001  |
| Language categories           |               |               |               |         |
| No delay, n (%)               | 325 (52)      | 178 (59)      | 147 (46)      |         |
| Suboptimal development, n (%) | 253 (40)      | 110 (36)      | 143 (44)      |         |
| Delayed, n (%)                | 48 (8)        | 15 (5)        | 33 (10)       | 0.001   |
| <i>Sample</i>                 | <i>n=592</i>  | <i>n=289</i>  | <i>n=303</i>  |         |
| Motor scores, mean (SD)       | 93.62 (11.89) | 94.40 (12.12) | 92.86 (11.63) | 0.111   |
| Motor categories              |               |               |               |         |
| No delay, n (%)               | 524 (84)      | 257 (85)      | 267 (83)      |         |
| Suboptimal development, n (%) | 95 (15)       | 41 (14)       | 54 (17)       |         |
| Delayed, n (%)                | 7 (1)         | 5 (2)         | 2 (1)         | 0.270   |

Continuous composite scores are presented as mean (SD). Categorical data presented as frequencies (percentages). Categories were defined as 'delay' (<2 standard deviations below mean), 'suboptimal development' (<1 standard deviation below mean) and 'no delay'. P-values presented are comparing sex differences.

**Table 3.** Univariate associations between intimate partner violence, covariates and proposed mediators and composite scores for developmental domains in complete case analysis.

|                                              | Composite Cognitive<br>(n=549)<br>Unadjusted<br>Coefficient (95% CI) | Composite Language<br>(n=598)<br>Unadjusted<br>Coefficient (95% CI) | Composite Motor<br>(n=521)<br>Unadjusted<br>Coefficient (95%<br>CI) |
|----------------------------------------------|----------------------------------------------------------------------|---------------------------------------------------------------------|---------------------------------------------------------------------|
| Intimate Partner Violence (IPV)              |                                                                      |                                                                     |                                                                     |
| Emotional IPV score                          | -0.32 (-0.58, -0.06)*                                                | -0.35 (-0.69, -0.01)*                                               | -0.58 (-0.93, -0.24)*                                               |
| Physical IPV score                           | -0.18 (-0.42, 0.05)                                                  | -0.23 (-0.54, 0.08)                                                 | -0.42 (-0.73, -0.11)*                                               |
| Sexual IPV score                             | -0.15 (-0.97, 0.67)                                                  | -0.16 (-1.29, 0.97)                                                 | -0.49 (-1.63, 0.65)                                                 |
| Sociodemographics                            |                                                                      |                                                                     |                                                                     |
| Maternal education (not completed secondary) | -1.31 (-2.70, 0.08)                                                  | -2.86 (-4.61, -1.11)*                                               | -0.93 (-2.78, 0.92)                                                 |
| Mother employed                              | 0.60 (-0.87, 2.08)                                                   | 0.34 (-1.57, 2.27)                                                  | 0.68 (-1.29, 2.65)                                                  |
| Mother married/partnered                     | -0.52 (-1.98, 0.93)                                                  | 0.47 (-1.43, 2.37)                                                  | 0.01 (-1.94, 1.95)                                                  |
| Household Income<br>>R5000                   | 0.73 (-0.92, 2.38)                                                   | 0.32 (-1.80, 2.45)                                                  | 1.63 (-0.55, 3.82)                                                  |
| Recruitment site: TC Newman                  | 1.19 (-0.16, 2.53)                                                   | 3.05 (1.35, 4.76)**                                                 | 1.13 (-0.66, 2.93)                                                  |
| Physical variables                           |                                                                      |                                                                     |                                                                     |
| Birth weight z-score                         | 0.42 (-0.17, 1.01)                                                   | 0.84 (0.09, 1.58)*                                                  | 0.62 (-0.17, 1.39)                                                  |
| Male                                         | -1.66 (-3.01, -0.32)*                                                | -4.27 (-5.96, -2.59)**                                              | -1.52 (-3.31, 0.27)                                                 |
| Child age (months)                           | -0.94 (-2.23, 0.34)                                                  | -0.10 (-1.74, 1.53)                                                 | -2.81 (-4.49, -1.12)*                                               |
| HIV exposed                                  | -1.71 (-3.30, -0.11)*                                                | -3.90 (-5.93, -1.87)**                                              | -0.76 (-2.89, 1.38)                                                 |
| Length for age z-score                       | 0.97 (0.36, 1.58)*                                                   | 0.77 (-0.01, 1.55)                                                  | 0.13 (-0.70, 0.97)                                                  |
| Weight for age z-score                       | 0.92 (0.32, 1.51)*                                                   | 0.64 (-0.12, 1.40)                                                  | 0.68 (-0.19, 1.47)                                                  |
| Weight for length z-score                    | 0.61 (0.02, 1.19)*                                                   | -0.34 (-0.41, 1.09)                                                 | 0.84 (0.05, 1.63)*                                                  |
| Proposed Psychosocial mediators              |                                                                      |                                                                     |                                                                     |
| Depression score                             | -0.02 (-0.11, 0.08)                                                  | -0.06 (-0.18, 0.06)                                                 | -0.12 (-0.25, 0.01)                                                 |
| Alcohol dependence score                     | -0.07 (-0.17, 0.03)                                                  | -0.03 (-0.16, 0.11)                                                 | 0.01 (-0.13, 0.15)                                                  |

Notes: All variables measured at 2 years of child age except birth weight, sex and HIV-exposure which were captured at birth. IPV sub-types, depression and alcohol dependence were included as continuous variables in all models.

Abbreviations: IPV=intimate partner violence.

\*p<0.05; \*\*p<0.001;

**Table 4.** Multivariable linear regression demonstrating the adjusted association of intimate partner violence and composite scores for developmental domains in complete case analysis sample.

|                     | <b>Composite Cognitive<br/>(n=549)</b> | <b>Composite Language<br/>(n=598)</b> | <b>Composite Motor<br/>(n=521)</b> |                       |
|---------------------|----------------------------------------|---------------------------------------|------------------------------------|-----------------------|
|                     | Adjusted <sup>#</sup>                  | Adjusted <sup>^</sup>                 | Adjusted <sup>+</sup>              | Adjusted <sup>+</sup> |
|                     | Coefficient (95% CI)                   | Coefficient (95% CI)                  | Coefficient (95% CI)               | Coefficient (95% CI)  |
| Emotional IPV score | -0.32 (-0.60, -0.04)*                  | -0.35 (-0.69, -0.01)*                 | -0.58 (-0.95, -0.20)*              |                       |
| Physical IPV score  |                                        |                                       | -0.42 (-0.75, -0.09)*              |                       |

Adjusted models were run only where IPV sub-type was associated with outcome explored ( $p < 0.05$ ) in bivariate analyses. For cognitive and language scores, only emotional IPV was associated in bivariate analyses and therefore run in multivariable models. Due to collinearity, emotional and physical IPV were run in separate multivariable models for motor development. IPV sub-types, depression and alcohol dependence were included as continuous variables in all models.

Abbreviations: IPV=intimate partner violence.

\* $p < 0.05$ ; \*\* $p < 0.001$

<sup>#</sup>Adjusted for child sex, HIV exposure, length-for-age z-scores, weight-for-age z-scores and weight-for-length z-scores at 24 months.

<sup>^</sup>Adjusted for maternal education, recruitment site, weight-for-age z-score at birth, child sex and HIV exposure.

<sup>+</sup>Adjusted for child age at assessment and weight-for-length z-scores at 24 months.

**Supplemental Table 1.** Comparison of psychosocial, demographic and clinical data between children included in complete case developmental models and those who are not.

|                                                 | In Development models | Not in Development model | p-value |
|-------------------------------------------------|-----------------------|--------------------------|---------|
| Intimate Partner Violence (IPV)                 |                       |                          |         |
| Emotional IPV score, median (IQR)               | 0 (0, 0)              | 0 (0, 0)                 | 0.669   |
| Physical IPV score, median (IQR)                | 0 (0, 0)              | 0 (0, 0)                 | 0.213   |
| Sexual IPV score, median (IQR)                  | 0 (0, 0)              | 0 (0, 0)                 | 0.160.  |
| Sociodemographics                               |                       |                          |         |
| Maternal education (did not complete secondary) | 393 (63)              | 302 (58)                 | 0.132   |
| Mother employed                                 | 225 (41)              | 99 (51)                  | 0.022*  |
| Mother married/partnered                        | 268 (49)              | 99 (51)                  | 0.718   |
| Household Income                                |                       |                          |         |
| <R5000                                          | 445 (73)              | 122 (63)                 | 0.671   |
| >R5000                                          | 164 (27)              | 47 (24)                  |         |
| Recruitment site: TC Newman                     | 274 (44)              | 235 (45)                 | 0.586   |
| Physical variables                              |                       |                          |         |
| Birth weight z-score, median (IQR)              | -0.59 (-1.34, 0.16)   | -0.51 (-1.22, -0.00)     | 0.744   |
| Male sex                                        | 321 (51)              | 269 (52)                 | 0.774   |
| HIV exposed                                     | 153 (24)              | 94 (18)                  | 0.010*  |
| Length for age z-scores, median (IQR)           | -1.10 (-1.80, -0.34)  | -1.03 (-1.85, -0.28)     | 0.846   |
| Weight for age z-scores, median (IQR)           | -0.31 (-1.10, 0.43)   | -0.24 (-1.01, 0.40)      | 0.6682  |
| Weight for length z-scores, median (IQR)        | 0.28 (-0.48, 1.13)    | 0.43 (-0.40, 1.09)       | 0.7542  |
| Psychosocial factors                            |                       |                          |         |
| Depression score, median (IQR)                  | 0 (0, 3)              | 0 (0, 5)                 | 0.415   |
| Alcohol dependence score, median (IQR)          | 0 (0,0)               | 0 (0,0)                  | 0.068   |

Data are presented as n(%) or median IQR). Birthweight and HIV exposure collected at birth; all other variables collected at 2 years of child age. Abbreviation: IPV=intimate partner violence.

\*p<0.05; \*\*p<0.001



**Supplemental Table 2.** Univariate associations between intimate partner violence, covariates and proposed mediators and composite scores for developmental domains in the multiple-imputation analysis sample.

|                                              | Composite Cognitive   | Composite Language     | Composite Motor       |
|----------------------------------------------|-----------------------|------------------------|-----------------------|
|                                              | Unadjusted            | Unadjusted             | Unadjusted            |
|                                              | Coefficient (95% CI)  | Coefficient (95% CI)   | Coefficient (95% CI)  |
| <b>Intimate Partner Violence (IPV)</b>       |                       |                        |                       |
| Emotional IPV score                          | -0.33 (-0.60, -0.06)* | -0.34 (-0.68, -0.01)*  | -0.51 (-0.86, -0.16)* |
| Physical IPV score                           | -0.19 (-0.43, 0.05)   | -0.20 (-0.50, 0.11)    | -0.39 (-0.70, -0.09)* |
| Sexual IPV score                             | -0.13 (-0.98, 0.71)   | -0.16 (-1.36, 1.04)    | -0.41 (-1.58, 0.75)   |
| <b>Sociodemographics</b>                     |                       |                        |                       |
| Maternal education (not completed secondary) | -1.31 (-2.69, 0.07)   | -3.20 (-4.94, -1.45)** | -1.45 (-3.30, 0.40)   |
| Mother employed                              | 0.48 (-1.02, 1.99)    | 0.13 (-1.81, 2.07)     | 0.41 (-1.55, 2.38)    |
| Mother married/partnered                     | -0.59 (-2.07, 0.89)   | 0.26 (-1.64, 2.16)     | 0.15 (-1.88, 2.18)    |
| Household Income                             |                       |                        |                       |
| >R5000                                       | 0.73 (-0.92, 2.38)    | 1.00 (-1.14, 3.13)     | 1.96 (-0.28, 4.20)    |
| TC Newman                                    | 1.20 (-0.15, 2.54)    | 3.12 (1.41, 4.84)**    | 0.89 (-0.91, 2.68)    |
| <b>Physical variables</b>                    |                       |                        |                       |
| Birth weight z-score                         | 0.44 (-0.15, 1.03)    | 0.68 (-0.07, 1.42)     | 0.58 (-0.21, 1.36)    |
| Male                                         | -1.67 (-3.01, -0.33)* | -4.07 (-5.77, -2.37)** | -1.70 (-3.49, 0.09)   |
| Child age (months)                           | -0.95 (-2.24, 0.33)   | -0.12 (-1.77, 1.53)    | -2.81 (-4.50, -1.11)* |
| HIV exposed                                  | -1.70 (-3.29, -0.10)* | -3.77 (-5.82, -1.72)** | -0.59 (-2.72, 1.54)   |
| Length for age z-score                       | 0.92 (0.33, 1.52)*    | 0.67 (-0.09, 1.42)     | 0.26 (-0.54, 1.06)    |
| Weight for age z-score                       | 0.84 (0.26, 1.43)*    | 0.64 (-0.10, 1.37)     | 0.82 (0.04, 1.60)*    |
| Weight for length z-score                    | 0.50 (-0.08, 1.08)    | 0.39 (-0.34, 1.11)     | 0.88 (0.10, 1.66)*    |
| <b>Proposed Psychosocial mediators</b>       |                       |                        |                       |
| Depression score                             | -0.02 (-0.12, 0.08)   | -0.06 (-0.18, 0.07)    | -0.11 (-0.24, 0.02)   |
| Alcohol dependence score                     | -0.08 (-0.19, 0.03)   | -0.03 (-0.17, 0.11)    | 0.03 (-0.11, 0.16)    |

Birthweight and HIV exposure collected at birth; all other variables collected at 2 years of child age. IPV sub-types, depression and alcohol dependence were included as continuous variables in all models.

Abbreviation: IPV= intimate partner violence.

\*p<0.05, \*\*p<0.001

**Supplemental Table 3.** Multivariable linear regression demonstrating the association of intimate partner violence with composite scores for developmental domains in the multiple-imputation analysis sample.

|                     | Cognitive scores      | Language scores      | Motor scores          |                      |
|---------------------|-----------------------|----------------------|-----------------------|----------------------|
|                     | Adjusted#             | Adjusted^            | Adjusted+             | Adjusted+            |
|                     | Coefficient (95% CI)  | Coefficient (95% CI) | Coefficient (95% CI)  | Coefficient (95% CI) |
| Emotional IPV score | -0.30 (-0.57, -0.03)* | -0.35 (-0.68, -0.01) | -0.52 (-0.87, -0.17)* |                      |
| Physical IPV score  |                       |                      | -0.39 (-0.70, -0.09)* |                      |

Adjusted models were run only where IPV sub-type was associated (p<0.05) with outcome explored in bivariate analyses. For cognitive and language scores, only emotional IPV was associated in bivariate analyses and therefore run in multivariable models. Due to collinearity, emotional and physical IPV were run in separate multivariable models for motor development. Adjusted models were run including same covariates as the complete case analysis, as noted below. IPV sub-types, depression and alcohol dependence were included as continuous variables in all models.

Abbreviations: IPV=intimate partner violence.

\*p<0.05; \*\*p<0.001

#Adjusted for child sex, HIV exposure, length-for-age z-scores, weight-for-age z-scores and weight-for-length z-scores at 24 months.

^Adjusted for maternal education, recruitment site, weight-for-age z-score at birth, child sex and HIV exposure.

+Adjusted for child age at assessment and weight-for-length z-scores at 24 months.



**Supplemental Table 4.** Univariate associations between proposed mediators and intimate partner violence in complete case sample.

|                          | <b>Emotional IPV</b><br>Coefficient (95% CI) | <b>Physical IPV</b><br>Coefficient (95% CI) |
|--------------------------|----------------------------------------------|---------------------------------------------|
| Depression score         | 1.01 (0.80, 1.22)**                          | 0.68 (0.49, 0.87)**                         |
| Alcohol dependence score | 0.34 (0.13, 0.56)*                           | 0.30 (0.12, 0.49)*                          |

IPV sub-types, depression and alcohol dependence were included as continuous variables in all models.

Abbreviation: IPV = intimate partner violence.

\*p<0.05, \*\*p<0.001

**Supplemental Table 5.** Univariate and adjusted associations between proposed mediators and developmental outcomes in complete case sample.

|            |            | <b>Cognitive scores<sup>#</sup></b><br>Coefficient (95% CI) | <b>Language scores<sup>^</sup></b><br>Coefficient (95% CI) | <b>Motor scores<sup>+</sup></b><br>Coefficient (95% CI) |
|------------|------------|-------------------------------------------------------------|------------------------------------------------------------|---------------------------------------------------------|
| Univariate | Depression | -0.02 (-0.11, 0.08)                                         | -0.06 (-0.18, 0.06)                                        | -0.12 (-0.25, 0.01)                                     |
|            | Alcohol    | -0.07 (-0.17, 0.03)                                         | -0.03 (-0.16, 0.11)                                        | 0.01 (-0.13, 0.15)                                      |
| Adjusted   | Depression | 0.02 (-0.08, 0.13)                                          | -0.05 (-0.18, 0.07)                                        | -0.04 (-0.19, 0.10)                                     |
|            | Alcohol    | -0.06 (-0.17, 0.05)                                         | 0.01 (-0.12, 0.14)                                         | 0.05 (-0.10, 0.20)                                      |

Notes: Adjusted associations between proposed mediators and developmental domains were run using linear regression. Depression and alcohol were run separately in adjusted regression models. IPV sub-types, depression and alcohol dependence were included as continuous variables in all models.

Abbreviation: IPV = intimate partner violence.

<sup>#</sup>Adjusted for intimate partner violence, child sex, HIV exposure, length-for-age z-scores, weight-for-age z-scores and weight-for-length z-scores at 24 months.

<sup>^</sup>Adjusted for intimate partner violence, maternal education, recruitment site, weight-for-age z-score at birth, child sex and HIV exposure.

<sup>+</sup>Adjusted for intimate partner violence, child age at assessment and weight-for-length z-scores at 24 months.

STROBE Statement—Checklist of items that should be included in reports of *cohort studies*

|                              | Item No | Recommendation                                                                                                                                                                                                                                                                                                         | Page No                                      |
|------------------------------|---------|------------------------------------------------------------------------------------------------------------------------------------------------------------------------------------------------------------------------------------------------------------------------------------------------------------------------|----------------------------------------------|
| <b>Title and abstract</b>    | 1       | (a) Indicate the study's design with a commonly used term in the title or the abstract                                                                                                                                                                                                                                 | 1                                            |
|                              |         | (b) Provide in the abstract an informative and balanced summary of what was done and what was found                                                                                                                                                                                                                    | 2                                            |
| <b>Introduction</b>          |         |                                                                                                                                                                                                                                                                                                                        |                                              |
| Background/rationale         | 2       | Explain the scientific background and rationale for the investigation being reported                                                                                                                                                                                                                                   | 3-5                                          |
| Objectives                   | 3       | State specific objectives, including any prespecified hypotheses                                                                                                                                                                                                                                                       | 5                                            |
| <b>Methods</b>               |         |                                                                                                                                                                                                                                                                                                                        |                                              |
| Study design                 | 4       | Present key elements of study design early in the paper                                                                                                                                                                                                                                                                | 5                                            |
| Setting                      | 5       | Describe the setting, locations, and relevant dates, including periods of recruitment, exposure, follow-up, and data collection                                                                                                                                                                                        | 5/6                                          |
| Participants                 | 6       | (a) Give the eligibility criteria, and the sources and methods of selection of participants. Describe methods of follow-up<br>(b) For matched studies, give matching criteria and number of exposed and unexposed                                                                                                      | 6<br>NA                                      |
| Variables                    | 7       | Clearly define all outcomes, exposures, predictors, potential confounders, and effect modifiers. Give diagnostic criteria, if applicable                                                                                                                                                                               | 6-9                                          |
| Data sources/<br>measurement | 8*      | For each variable of interest, give sources of data and details of methods of assessment (measurement). Describe comparability of assessment methods if there is more than one group                                                                                                                                   | 6-9                                          |
| Bias                         | 9       | Describe any efforts to address potential sources of bias                                                                                                                                                                                                                                                              | 11                                           |
| Study size                   | 10      | Explain how the study size was arrived at                                                                                                                                                                                                                                                                              | 11                                           |
| Quantitative variables       | 11      | Explain how quantitative variables were handled in the analyses. If applicable, describe which groupings were chosen and why                                                                                                                                                                                           | 10-11                                        |
| Statistical methods          | 12      | (a) Describe all statistical methods, including those used to control for confounding<br>(b) Describe any methods used to examine subgroups and interactions<br>(c) Explain how missing data were addressed<br>(d) If applicable, explain how loss to follow-up was addressed<br>(e) Describe any sensitivity analyses | 10-11<br>N/A<br>Supplemental<br>Supplemental |
| <b>Results</b>               |         |                                                                                                                                                                                                                                                                                                                        |                                              |
| Participants                 | 13*     | (a) Report numbers of individuals at each stage of study—eg numbers potentially eligible, examined for eligibility, confirmed eligible, included in the study, completing follow-up, and analysed<br>(b) Give reasons for non-participation at each stage<br>(c) Consider use of a flow diagram                        | 11<br>11                                     |
| Descriptive data             | 14*     | (a) Give characteristics of study participants (eg demographic, clinical, social) and information on exposures and potential confounders<br>(b) Indicate number of participants with missing data for each variable of interest<br>(c) Summarise follow-up time (eg, average and total amount)                         | 12<br>Table 1                                |
| Outcome data                 | 15*     | Report numbers of outcome events or summary measures over time                                                                                                                                                                                                                                                         | 12, Table 2                                  |

|                                           |                          |    |                                                                                                                                                                                                                                                                                                                                                                                                               |                                              |
|-------------------------------------------|--------------------------|----|---------------------------------------------------------------------------------------------------------------------------------------------------------------------------------------------------------------------------------------------------------------------------------------------------------------------------------------------------------------------------------------------------------------|----------------------------------------------|
| 1<br>2<br>3<br>4<br>5<br>6<br>7<br>8<br>9 | Main results             | 16 | (a) Give unadjusted estimates and, if applicable, confounder-adjusted estimates and their precision (eg, 95% confidence interval). Make clear which confounders were adjusted for and why they were included<br>(b) Report category boundaries when continuous variables were categorized<br>(c) If relevant, consider translating estimates of relative risk into absolute risk for a meaningful time period | 12-13<br>Tables 3,4<br><br>7-8<br>Tables 1,2 |
| 10<br>11<br>12                            | Other analyses           | 17 | Report other analyses done—eg analyses of subgroups and interactions, and sensitivity analyses                                                                                                                                                                                                                                                                                                                | Supplemental tables                          |
| 13                                        | <b>Discussion</b>        |    |                                                                                                                                                                                                                                                                                                                                                                                                               |                                              |
| 14                                        | Key results              | 18 | Summarise key results with reference to study objectives                                                                                                                                                                                                                                                                                                                                                      | 13-14                                        |
| 15<br>16<br>17<br>18                      | Limitations              | 19 | Discuss limitations of the study, taking into account sources of potential bias or imprecision. Discuss both direction and magnitude of any potential bias                                                                                                                                                                                                                                                    | 16-17                                        |
| 19<br>20<br>21<br>22                      | Interpretation           | 20 | Give a cautious overall interpretation of results considering objectives, limitations, multiplicity of analyses, results from similar studies, and other relevant evidence                                                                                                                                                                                                                                    | 17                                           |
| 23<br>24                                  | Generalisability         | 21 | Discuss the generalisability (external validity) of the study results                                                                                                                                                                                                                                                                                                                                         | 16-17                                        |
| 25                                        | <b>Other information</b> |    |                                                                                                                                                                                                                                                                                                                                                                                                               |                                              |
| 26<br>27<br>28<br>29                      | Funding                  | 22 | Give the source of funding and the role of the funders for the present study and, if applicable, for the original study on which the present article is based                                                                                                                                                                                                                                                 | 1                                            |

30  
31 \*Give information separately for exposed and unexposed groups.

32  
33  
34 **Note:** An Explanation and Elaboration article discusses each checklist item and gives methodological background and published examples of transparent reporting. The STROBE checklist is best used in conjunction with this article (freely available on the Web sites of PLoS Medicine at <http://www.plosmedicine.org/>, Annals of Internal Medicine at <http://www.annals.org/>, and Epidemiology at <http://www.epidem.com/>). Information on the STROBE Initiative is available at <http://www.strobe-statement.org>.

40  
41  
42  
43  
44  
45  
46  
47  
48  
49  
50  
51  
52  
53  
54  
55  
56  
57  
58  
59  
60

# BMJ Open

## Maternal emotional and physical intimate partner violence and early child development: investigating mediators in a cross sectional study in a South African birth cohort.

|                                 |                                                                                                                                                                                                                                                                                                                                                                                                                                                                                                                                                                                                                                                                                                                                                                                                                                                                                                                                                                                                                                                                                                                                                                                                                                                                                                                                                                                                                                                                                                                                                                                                                                                                                                                                                                                                                                                                                                                                    |
|---------------------------------|------------------------------------------------------------------------------------------------------------------------------------------------------------------------------------------------------------------------------------------------------------------------------------------------------------------------------------------------------------------------------------------------------------------------------------------------------------------------------------------------------------------------------------------------------------------------------------------------------------------------------------------------------------------------------------------------------------------------------------------------------------------------------------------------------------------------------------------------------------------------------------------------------------------------------------------------------------------------------------------------------------------------------------------------------------------------------------------------------------------------------------------------------------------------------------------------------------------------------------------------------------------------------------------------------------------------------------------------------------------------------------------------------------------------------------------------------------------------------------------------------------------------------------------------------------------------------------------------------------------------------------------------------------------------------------------------------------------------------------------------------------------------------------------------------------------------------------------------------------------------------------------------------------------------------------|
| Journal:                        | <i>BMJ Open</i>                                                                                                                                                                                                                                                                                                                                                                                                                                                                                                                                                                                                                                                                                                                                                                                                                                                                                                                                                                                                                                                                                                                                                                                                                                                                                                                                                                                                                                                                                                                                                                                                                                                                                                                                                                                                                                                                                                                    |
| Manuscript ID                   | bmjopen-2020-046829.R1                                                                                                                                                                                                                                                                                                                                                                                                                                                                                                                                                                                                                                                                                                                                                                                                                                                                                                                                                                                                                                                                                                                                                                                                                                                                                                                                                                                                                                                                                                                                                                                                                                                                                                                                                                                                                                                                                                             |
| Article Type:                   | Original research                                                                                                                                                                                                                                                                                                                                                                                                                                                                                                                                                                                                                                                                                                                                                                                                                                                                                                                                                                                                                                                                                                                                                                                                                                                                                                                                                                                                                                                                                                                                                                                                                                                                                                                                                                                                                                                                                                                  |
| Date Submitted by the Author:   | 12-May-2021                                                                                                                                                                                                                                                                                                                                                                                                                                                                                                                                                                                                                                                                                                                                                                                                                                                                                                                                                                                                                                                                                                                                                                                                                                                                                                                                                                                                                                                                                                                                                                                                                                                                                                                                                                                                                                                                                                                        |
| Complete List of Authors:       | <p>Barnett, Whitney; University of Cape Town Faculty of Health Sciences, Department of Paediatrics and Child Health &amp; South African Medical Research Council Unit on Child &amp; Adolescent Health</p> <p>Halligan, Sarah; University of Bath, Department of Psychology; University of Cape Town Faculty of Health Sciences, Department of Psychiatry and Mental Health &amp; South African Medical Research Council Unit on Risk and Resilience in Mental Disorders</p> <p>Wedderburn, Catherine; London School of Hygiene &amp; Tropical Medicine, Department of Clinical Research; University of Cape Town, Department of Paediatrics and Child Health &amp; South African Medical Research Council Unit on Child &amp; Adolescent Health</p> <p>MacGinty, Rae; University of Cape Town Faculty of Health Sciences, Department of Paediatrics and Child Health &amp; South African Medical Research Council Unit on Child &amp; Adolescent Health</p> <p>Hoffman, Nadia; University of Cape Town Faculty of Health Sciences, Department of Psychiatry and Mental Health &amp; South African Medical Research Council Unit on Risk and Resilience in Mental Disorders</p> <p>Zar, Heather; University of Cape Town Faculty of Health Sciences, Department of Paediatrics and Child Health &amp; South African Medical Research Council Unit on Child &amp; Adolescent Health</p> <p>Stein, Dan; University of Cape Town Faculty of Health Sciences, Department of Psychiatry and Mental Health &amp; South African Medical Research Council Unit on Risk and Resilience in Mental Disorders;</p> <p>University of Cape Town Faculty of Health Sciences, Neuroscience Institute</p> <p>Donald, Kirsten; University of Cape Town Faculty of Health Sciences, Division of Developmental Paediatrics, Department of Paediatrics and Child Health; University of Cape Town Faculty of Health Sciences, Neuroscience Institute</p> |
| <b>Primary Subject Heading</b>: | Paediatrics                                                                                                                                                                                                                                                                                                                                                                                                                                                                                                                                                                                                                                                                                                                                                                                                                                                                                                                                                                                                                                                                                                                                                                                                                                                                                                                                                                                                                                                                                                                                                                                                                                                                                                                                                                                                                                                                                                                        |
| Secondary Subject Heading:      | Global health, Public health                                                                                                                                                                                                                                                                                                                                                                                                                                                                                                                                                                                                                                                                                                                                                                                                                                                                                                                                                                                                                                                                                                                                                                                                                                                                                                                                                                                                                                                                                                                                                                                                                                                                                                                                                                                                                                                                                                       |
| Keywords:                       | Developmental neurology & neurodisability < PAEDIATRICS, PUBLIC HEALTH, TRAUMA MANAGEMENT                                                                                                                                                                                                                                                                                                                                                                                                                                                                                                                                                                                                                                                                                                                                                                                                                                                                                                                                                                                                                                                                                                                                                                                                                                                                                                                                                                                                                                                                                                                                                                                                                                                                                                                                                                                                                                          |
|                                 |                                                                                                                                                                                                                                                                                                                                                                                                                                                                                                                                                                                                                                                                                                                                                                                                                                                                                                                                                                                                                                                                                                                                                                                                                                                                                                                                                                                                                                                                                                                                                                                                                                                                                                                                                                                                                                                                                                                                    |

1  
2  
3  
4  
5  
6  
7  
8  
9  
10  
11  
12  
13  
14  
15  
16  
17  
18  
19  
20  
21  
22  
23  
24  
25  
26  
27  
28  
29  
30  
31  
32  
33  
34  
35  
36  
37  
38  
39  
40  
41  
42  
43  
44  
45  
46  
47  
48  
49  
50  
51  
52  
53  
54  
55  
56  
57  
58  
59  
60

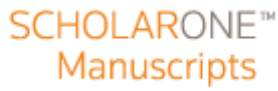

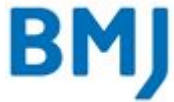

I, the Submitting Author has the right to grant and does grant on behalf of all authors of the Work (as defined in the below author licence), an exclusive licence and/or a non-exclusive licence for contributions from authors who are: i) UK Crown employees; ii) where BMJ has agreed a CC-BY licence shall apply, and/or iii) in accordance with the terms applicable for US Federal Government officers or employees acting as part of their official duties; on a worldwide, perpetual, irrevocable, royalty-free basis to BMJ Publishing Group Ltd ("BMJ") its licensees and where the relevant Journal is co-owned by BMJ to the co-owners of the Journal, to publish the Work in this journal and any other BMJ products and to exploit all rights, as set out in our [licence](#).

The Submitting Author accepts and understands that any supply made under these terms is made by BMJ to the Submitting Author unless you are acting as an employee on behalf of your employer or a postgraduate student of an affiliated institution which is paying any applicable article publishing charge ("APC") for Open Access articles. Where the Submitting Author wishes to make the Work available on an Open Access basis (and intends to pay the relevant APC), the terms of reuse of such Open Access shall be governed by a Creative Commons licence – details of these licences and which [Creative Commons](#) licence will apply to this Work are set out in our licence referred to above.

Other than as permitted in any relevant BMJ Author's Self Archiving Policies, I confirm this Work has not been accepted for publication elsewhere, is not being considered for publication elsewhere and does not duplicate material already published. I confirm all authors consent to publication of this Work and authorise the granting of this licence.

1  
2  
3 Maternal emotional and physical intimate partner violence and early child development:  
4 investigating mediators in a cross sectional study in a South African birth cohort.  
5  
6

7 Whitney Barnett<sup>a</sup>, Sarah L Halligan<sup>b,c</sup>, Catherine J Wedderburn<sup>a,c,d,e</sup>, Rae MacGinty<sup>a</sup>, Nadia  
8 Hoffman<sup>c</sup>, Heather J. Zar<sup>a</sup>, Dan J. Stein<sup>c,d</sup>, Kirsten A Donald<sup>d,f</sup>  
9

10  
11 <sup>a</sup>Department of Paediatrics and Child Health & South African Medical Research Council  
12 Unit on Child & Adolescent Health, University of Cape Town, South Africa; <sup>b</sup>Department of  
13 Psychology, University of Bath, United Kingdom; <sup>c</sup>Department of Psychiatry and Mental  
14 Health & South African Medical Research Council Unit on Risk and Resilience in Mental  
15 Disorders, University of Cape Town, South Africa; <sup>d</sup>Neuroscience Institute, University of  
16 Cape Town, South Africa <sup>e</sup>Department of Clinical Research, London School of Hygiene &  
17 Tropical Medicine, London, UK; <sup>f</sup>Division of Developmental Paediatrics, Department of  
18 Paediatrics & Child Health, University of Cape Town, South Africa  
19  
20

21 **Corresponding author:**

22 Whitney Barnett  
23 Department of Paediatrics and Child Health  
24 Unit B11, REACH Center  
25 Red Cross War Memorial Children's Hospital  
26 Cape Town, South Africa  
27 [barnett.whitney@gmail.com](mailto:barnett.whitney@gmail.com)  
28 Tel: +27 (0) 790432604  
29

30  
31 **Key words:** toddler development, intimate partner violence, LMIC, IPV, child development  
32

33 **Word count:** 4,080  
34

35 **Funding**

36 The study was funded by the Bill and Melinda Gates Foundation [OPP 1017641]. Additional  
37 support for HJZ and DJS is from the SA MRC. Additional aspects of the work reported here  
38 are supported by an Academy of Medical Sciences Newton Advanced Fellowship  
39 (NAF002\1001), funded by the UK Government's Newton Fund, by the UK MRC  
40 (MR/T002816/1) and by the US Brain and Behaviour Foundation Independent Investigator  
41 grant (24467). WB is supported by the SAMRC, through its Division of Research Capacity  
42 Development under the Bongani Mayosi National Health Scholars programme. CJW was  
43 supported by the Wellcome Trust through a Research Training Fellowship [203525/Z/16/Z].  
44

45 **Acknowledgements**

46  
47 We thank the study staff in Paarl, the study data team and lab teams, the clinical and  
48 administrative staff of the Western Cape Government Health Department at Paarl Hospital  
49 and at the clinics for support of the study. We thank the families and children who  
50 participated in this study.  
51  
52  
53  
54  
55  
56  
57  
58  
59  
60

## Abstract

**Objectives:** This study investigated associations between recent maternal intimate partner violence (emotional, physical and sexual) and child development at 2 years as well as whether maternal depression or alcohol use mediated these relationships.

**Design:** Cross sectional study nested in a South African birth cohort.

**Setting:** Two primary care clinics in Paarl, South Africa.

**Participants:** 626 mother-child pairs; inclusion criteria for maternal antenatal enrolment were clinic attendance and remaining in the study area for at least 1 year; women were excluded if a minor.

**Primary outcome measures:** Child cognitive, language and motor development composite scores. These were assessed using the Bayley Scales of Infant and Toddler Development, 3<sup>rd</sup> edition (BSID-III).

**Results:** Emotional IPV was associated with lower cognitive ( $\beta=-0.32$ ; 95%CI -0.60,-0.04), language ( $\beta=-0.36$ ; 95%CI -0.69,-0.01) or motor composite scores ( $\beta=-0.58$ ; 95%CI -0.95,-0.20) in children at 2 years of age. Physical IPV was associated with lower motor scores ( $\beta=-0.42$ ; 95%CI -0.75,-0.09) at 2 years. Sexual IPV was unrelated to developmental outcomes, possibly due to low prevalence. Neither recent maternal depression nor alcohol use were shown to mediate the relationship between IPV and developmental outcomes.

**Conclusions:** Interventions to reduce maternal physical and emotional IPV and early-life interventions for infants and toddlers are needed to promote optimal child development.

### Strengths and limitations of this study

- This study investigates the unique impact of multiple types of IPV (emotional, physical and sexual) on developmental outcomes in very young children in a high-risk setting.
- A key strength of this study includes measurement of a broad range of risk factors and robust measurement of developmental outcomes in a representative sample of participants in a LMIC setting.
- Understanding the factors underlying associations between IPV and poor child development is critical to better inform interventions and policy, thus we investigated both maternal postnatal depression and alcohol use as potential mediators of IPV-child development relationships in this cohort.
- The current study used cross sectional data and therefore did not investigate longitudinal exposures and cannot assert causality.



## Background

Intimate partner violence (IPV) is one of the most common forms of violence against women. The World Health Organization's multicountry study on violence against women found high lifetime prevalence of physical IPV (up to 61%), sexual IPV (up to 59%) and emotional IPV (up to 75%).<sup>1</sup> The epidemic of IPV is particularly marked in low-and-middle-income countries (LMICs), including South Africa, where prevalence is amongst the highest globally.<sup>2,3</sup> Children in households with IPV are often witnesses and are at increased risk for abuse or neglect.<sup>4,5</sup> The United Nations estimates that each year between 133–275 million children witness violence between primary caregivers.<sup>6</sup> Exposure to violence in the home is linked to many adverse health outcomes in children, including developmental, psychological and behavioural impairments.<sup>7-9</sup> Importantly, these often impact health and development beyond childhood, having negative effects that extend into adolescence and adulthood.<sup>8,10</sup> However, there remain several gaps in the existing literature.

Relatively little research has examined associations between the presence of IPV and poorer cognitive, language and motor development in infancy and very early childhood<sup>11-13</sup> though it is a critical developmental period that can have significant implications for long-term health.<sup>14</sup> Where data are available, exposure to IPV in the first two years of life has been associated with increased risk of developmental delay.<sup>12,13</sup> Healthy development during the first years of life is vital, given its impact on academic performance and mental health across the lifespan.<sup>10,14</sup> Indeed, a longitudinal study through 8 years found that exposure to interpersonal trauma (maltreatment and/or witnessing IPV) in the first two years of life was associated with the poorest cognitive outcomes compared to other periods in childhood.<sup>15</sup>

1  
2  
3 Research focusing on child development and IPV often narrowly defines IPV  
4 as only physical or sexual abuse,<sup>12,13,16</sup> though emotional IPV has been linked to similar  
5 or increased rates of ill-health, both physical and mental, compared to physical IPV.<sup>17-</sup>  
6  
7  
8  
9  
10 <sup>20</sup> Additionally, the majority of studies, particularly in school-aged children, have been  
11 done in high income countries (HICs),<sup>8,11,21</sup> though LMICs have a higher burden of  
12 IPV-associated risk factors, such as community violence, trauma, substance use  
13 disorders and mental illness and limited support networks. South Africa in particular  
14 has among the highest burdens of interpersonal violence in the world.<sup>22</sup> The roots of  
15 high levels of violence can be linked to South Africa's colonial and apartheid past,  
16 including the impacts of systemic racism, impoverishment, migrant labour, gender  
17 norms and constructions of masculinity; their ongoing legacy continues to impact  
18 extremely high levels of violence in South Africa.<sup>23</sup> Zembe and colleagues investigated  
19 social risk factors and relationship power inequity and IPV in a South African sample,  
20 finding high acceptability of violence in intimate relationships as well as gender norms  
21 supporting aggressive masculinity and subservient femininity, particularly in  
22 historically marginalized groups such as those included in the present study.<sup>24</sup>  
23  
24  
25  
26  
27  
28  
29  
30  
31  
32  
33  
34  
35  
36  
37  
38  
39

40 Lastly, a key gap in the existing literature examining associations between IPV  
41 exposure and early life child developmental outcomes is investigation of potential  
42 mediators in this relationship, particularly in LMIC settings. Several potential  
43 mechanisms underlying the relationship between IPV and child development have been  
44 proposed. For instance, maternal depression as well as alcohol use have been separately  
45 linked to both IPV and development outcomes,<sup>13,20</sup> potentially compromising maternal-  
46 child attachment, impacting maternal autonomy and caregiving, diverting financial  
47 resources in the home and may increase the risk of child maltreatment or abuse.<sup>25</sup>  
48 Alcohol is one of the most commonly misused substances, with extremely high  
49  
50  
51  
52  
53  
54  
55  
56  
57  
58  
59  
60

1  
2  
3 prevalence of alcohol use disorders in South Africa,<sup>26</sup> and maternal use postnatally is  
4 associated with poorer child development and academic performance.<sup>27-29</sup> Maternal  
5 depression has been linked to insecure mother-child attachment,<sup>30</sup> less sensitive and  
6 responsive caregiving,<sup>31</sup> and reduced health care service utilization<sup>32</sup> adversely  
7 impacting care and stimulation needed for healthy development. Although there is  
8 evidence linking proposed mediators to both IPV and early-life development, extremely  
9 few have formally investigated potential explanatory factors.<sup>33</sup>

10  
11  
12 This study aims to explore associations between IPV sub-types (emotional,  
13 physical and sexual) and child development (cognitive, language and motor) at two  
14 years of age and to investigate potential mechanisms underlying this relationship. The  
15 current study addresses three key gaps in the literature, specifically by (i) investigating  
16 associations between IPV and development in very young children (ii) investigating the  
17 differential impact of sub-types of IPV and (iii) investigating maternal depression or  
18 alcohol use as potential mediators in these relationships. Given the high prevalence of  
19 IPV in low resource settings, understanding the significant impact IPV exposure may  
20 have on young children during this developmentally sensitive period and improved  
21 understanding of possible pathways underlying these relationships is important for  
22 improving child potential globally.<sup>11</sup>

## 23 24 25 26 27 28 29 30 31 32 33 34 35 36 37 38 39 40 41 42 43 44 45 46 47 **Methods**

48  
49 The parent study is a longitudinal, population-based birth cohort study  
50 following mother-child dyads from pregnancy through childhood.<sup>34-36</sup> The study is  
51 located in a periurban area in South Africa, characterised by low socioeconomic status  
52 (SES) and psychosocial risk factors. There is a free primary health care system, that  
53 includes antenatal and child health services. The current cross sectional analysis uses  
54  
55  
56  
57  
58  
59  
60

1  
2  
3 data from three study visits occurring at or near 2 years of child age; only birthweight  
4 and HIV exposure were collected prior to 2 years of age, at birth, as described below.  
5  
6  
7  
8  
9

### 10 *Participants*

11  
12 Pregnant women were enrolled from March 2012 to March 2015. Women were  
13 enrolled in their second trimester, between 20 and 28 weeks' gestation at two public  
14 sector primary healthcare clinics, one serving a predominantly mixed-ancestry  
15 population and the other serving a predominantly Black African population. Our  
16 intention in using the historic terms of *Black African* and *mixed ancestry* is not meant  
17 to reify these terms, but to contribute to the literature on ongoing health disparities.  
18  
19 Inclusion criteria were: (1) pregnant women attending one of the two study clinics; (2)  
20 aged 18 years or older; and (3) intending to remain in the study area for at least 1 year.  
21  
22  
23  
24  
25  
26  
27  
28  
29  
30  
31  
32

### 33 *Ethical considerations*

34  
35 Ethical approval was obtained from the Faculty of Health Sciences Research  
36 Ethics Committee, University of Cape Town (401/2009) and the Western Cape  
37 Provincial Research committee. Mothers gave written informed consent at enrolment  
38 and were re-consented annually thereafter. Study staff were trained in ethical conduct  
39 of violence and mental health research, including confidentiality, and identification and  
40 management of risk. Interviews were conducted privately, data were de-identified and  
41 only accessible to study staff to ensure confidentiality. Where significant mental health  
42 issues or safety concerns were identified, staff referred participants to appropriate care  
43 or social services (including support services for IPV, substance abuse and mental  
44 health issues).  
45  
46  
47  
48  
49  
50  
51  
52  
53  
54  
55  
56  
57  
58  
59  
60

### *Clinical and sociodemographic data*

Sociodemographic information was collected from the mother at a visit two years after their child's birth, using a standardized questionnaire adapted from items included in the South African Stress and Health Study.<sup>37</sup> Maternal education (any secondary versus completed secondary), employment and partnership status (single or married/marriage-like relationship) and household income [ $<R,1000$ /month (60USD), R1,000 to R5000 (350USD) or  $>R5,000$ /month] were self-reported at 2 years postpartum. Maternal HIV status during pregnancy was confirmed by routine testing during antenatal care. All HIV-exposed children were tested per the Western Cape prevention of mother-to-child transmission guidelines.<sup>38</sup> Birthweight and postnatal anthropometric measurements were collected by trained staff at birth and 2 years, as has been described.<sup>39</sup>

### *Intimate partner violence*

Recent maternal IPV was measured at 2 years postpartum using the Intimate Partner Violence Questionnaire (IPVQ), a 12-item inventory adapted from the WHO multicountry study<sup>1</sup> and the Women's Health Study in Zimbabwe.<sup>40</sup> The IPVQ assessed recent (past-year) exposure to emotional (4 of 12 questionnaire items), physical (5 of 12 items), and sexual abuse (3 of 12 items). Partner behavior indicating emotional IPV included having been insulted or made to feel bad, having been humiliated in front of others, intentionally scared or intimidated or threatened with physical harm. Physical IPV included being slapped, pushed, shoved, hit with an object, beaten or choked. Sexual IPV exposure was classified based on having been forced to have sex, afraid not to have sex or forced to do something sexual which was degrading or humiliating. Mothers were asked about frequency of exposure to partner behavior

1  
2  
3 (“never”, “once”, “a few times” or “many times”). Items were then summed to create  
4  
5 scores for each IPV sub-type with higher scores indicating greater severity and  
6  
7 frequency of exposure; exposure was defined as a score >1 indicating more than an  
8  
9 isolated incident within each subtype. Scoring guidelines were devised for the purposes  
10  
11 of this study, and were based on prior work in South Africa.<sup>41</sup>  
12  
13  
14  
15  
16

### 17 *Proposed mediating variables*

18  
19 Recent maternal depression was measured using the Beck Depression Inventory  
20  
21 (BDI), a validated and reliable screening tool for depressive symptoms at 2 years post-  
22  
23 partum.<sup>42,43</sup> The BDI-II comprises 21 items, which assesses severity of symptoms of  
24  
25 major depression on a severity scale from 0 (absence of symptoms) to 3 (severe).  
26  
27 Individual items are summed to obtain a total score, with higher scores indicating more  
28  
29 severe depressive symptoms. A cut off score of  $\geq 20$  was used to indicate participants  
30  
31 with probable depression.<sup>44</sup> The Alcohol, Smoking and Substance Involvement Screen  
32  
33 Test (ASSIST) was used to measure current maternal alcohol-related risk at 2 years of  
34  
35 child age.<sup>45</sup> Alcohol related items were summed to create a score for alcohol-related  
36  
37 problems with higher scores indicating greater substance-related risk. We used  
38  
39 published guidelines for the ASSIST to classify alcohol scores into three categories for  
40  
41 descriptive purposes: low/no risk (0-10), moderate risk (11-26) and high risk (>26),  
42  
43 with the likelihood of alcohol dependence.<sup>46</sup>  
44  
45  
46  
47  
48  
49  
50

### 51 *Bayley Scales of Infant and Toddler Development, 3<sup>rd</sup> edition (BSID-III)*

52  
53 The Bayley Scales of Infant and Toddler Development, third edition (BSID-  
54  
55 III)<sup>47</sup> was used to measure toddler neurodevelopment. It is widely used to assess  
56  
57 development in children ages 2 to 42 months and has been validated for use in South  
58  
59  
60

1  
2  
3 Africa.<sup>48</sup> Assessments for neurodevelopment were done at 2 years of child age by  
4 trained physiotherapists and occupational therapists supervised by a paediatric  
5 neurodevelopmental specialist.<sup>36</sup> Quality control and monitoring processes were  
6 implemented to ensure accuracy. Assessments were conducted with language prompts  
7 in the child's preferred language and assessors alternated between sites and assessed a  
8 similar number of children. In the current study, composite scores for cognition,  
9 language and motor development were used. The composite scores are calculated using  
10 a normal US population, and are standardised to have a mean of 100 and standard  
11 deviation of 15. Composite scores are strongly correlated to raw scores in the current  
12 study and allow comparison across domains. Continuous composite scores as well as  
13 categorical outcomes are reported. Categories were defined as 'delay' (<2 standard  
14 deviations below mean), 'suboptimal development' (<1 standard deviation below  
15 mean) and 'no delay'.

### 35 *Patient and public involvement*

36  
37 Investigators have established close relationships with key stakeholders  
38 including Western Cape Government Health Department and community members.  
39 Participants were not involved in the design or recruitment of the DCHS. However,  
40 participant experience and satisfaction have been assessed at multiple time points.<sup>49</sup>  
41 Participant feedback about study experience, information provided and study  
42 procedures have been used ongoing to reassess study protocols and to make  
43 alternations to improve study experience and participant satisfaction. Study findings  
44 are routinely fed back to the community and the Department of Health  
45 clinical and administrative staff.

## Data analysis

The analyses were conducted using STATA 15 (StataCorp Inc., College Station, Texas, USA). Demographic, clinical, psychosocial and child development data were described using median (interquartile range (IQR)) for continuous data or number (%) for categorical data. Developmental data were compared by child sex using Pearson's Chi-square test for categorical data and the Wilcoxon Rank Sum test for continuous data.

Mean composite scores were calculated for the Bayley-III for cognitive, language and motor domains. Birthweight was converted to z-scores based on child sex and gestational age using the INTERGROWTH-21<sup>st</sup> standards<sup>50</sup>. Postnatal weight-for-age z-scores (WFAZ), length-for-age z-scores (LFAZ) and weight-for-length z-scores (WFHZ) were calculated using weight and length measurements at 24 months, using Anthro software (WHO, Geneva, Switzerland)<sup>51</sup>. These as well as emotional, physical and sexual IPV and proposed mediator variables were included as continuous scores in all analyses.

We examined associations using a complete case analysis sample. Bivariate linear regression analyses were used to investigate the relationship between developmental domains, clinical and demographic variables, proposed mediators and IPV sub-types. Regression coefficients with 95% confidence intervals (CIs) are reported. Multivariable linear regression models were then run for each of the developmental (composite cognitive, language and motor scores) outcomes, including significant univariable coefficients ( $p < 0.05$ ). Continuous scores were used for exposure, mediator and outcome data in multivariable models. Where multiple IPV sub-types were significant in bivariate regression, adjusted models were run for each separately, as these were highly correlated. Hypothesized mediators of the relationship



1  
2  
3 between IPV and early life development (current maternal depression and alcohol use)  
4 were investigated. Criteria for formal investigation of potential mediators were 1) their  
5 association with developmental outcomes, using a cut-off level of  $p < 0.05$ , in final  
6 adjusted models (path b) and 2) where associations between IPV and the hypothesized  
7 mediator were significant (path a).  
8  
9

10  
11  
12 In addition to the analysis of observations with complete data, we examined  
13 associations after imputing missing data for covariates and developmental outcomes  
14 using multiple imputation with chained equations (MICE). We assumed covariate data  
15 were missing at random and performed 30 imputations. Results from complete case and  
16 imputed datasets produced similar conclusions. Results based on imputed data are  
17 presented in Supplemental Tables. To explore potential selection bias, we assessed the  
18 characteristics of mother-child dyads with complete and missing data, using Pearson's  
19 Chi-squared and Wilcoxon Rank Sum tests to compare covariate distributions between  
20 groups.  
21  
22  
23  
24  
25  
26  
27  
28  
29  
30  
31  
32  
33  
34  
35  
36  
37

## 38 **Results**

39  
40 Of 1143 study births, 154 (13.5%) children were lost to follow up before  
41 reaching two years of age primarily due to moving out of the study area or being  
42 uncontactable or unavailable for follow up visits. A further 255 (25.8%) did not  
43 complete a BSID-III assessment due to non-attendance on the day or moving out of the  
44 study area. Data for the current study was collected across three visits at approximately  
45 2 years of child age: a clinical visit for growth and sociodemographic data collection; a  
46 psychosocial visit for maternal depression and substance use data and a visit assessing  
47 child development. A total of 626 children who completed the BSID-III assessment and  
48 had IPV exposure and covariate data were included in the final complete case dataset.  
49  
50  
51  
52  
53  
54  
55  
56  
57  
58  
59  
60

1  
2  
3 Comparing the characteristics of dyads with complete and missing exposure or outcome  
4 data, mothers with missing data were less likely to be HIV infected ( $p=0.01$ ) and less  
5 likely to be employed ( $p=0.02$ , Supplemental Table 1).  
6  
7  
8  
9

10 Clinical, demographic, and psychosocial characteristics at two years are  
11 presented in Table 1. This sample was characterized by low maternal employment  
12 (41%), low maternal education (37% completed secondary education), low household  
13 income (only 27% earning more than R5,000 per month [approximately USD 350]).  
14 Almost half of mothers were married or cohabiting (49%) and 24% of children were  
15 HIV exposed with only 2 children HIV-infected. A minority of mothers experienced  
16 psychosocial risk factors or substance use, including emotional IPV (16%), physical  
17 IPV (17%) and sexual IPV (4%), alcohol (10% moderate/high risk), and depression  
18 (6%), Table 1.  
19  
20  
21  
22  
23  
24  
25  
26  
27  
28  
29  
30  
31  
32

### 33 *Developmental outcomes*

34  
35 A total of 28/625 (4%) children were categorised as having cognitive delay ( $<2$   
36 standard deviations below mean), 48/598 (8%) with language delay and 7/592 (1%) with  
37 motor delay. Only language differed significantly by child sex, with males having a  
38 higher prevalence of delay compared to females (10% versus 5%;  $p$  value=0.001) and  
39 lower composite scores ( $p<0.001$ ), Table 2.  
40  
41  
42  
43  
44  
45  
46  
47  
48

### 49 *Intimate partner violence and developmental outcomes*

50  
51 At 24 months, bivariate analysis showed that emotional IPV was associated with  
52 lower composite cognitive scores ( $\beta=-0.32$ ; 95% CI -0.58,-0.06), lower composite  
53 language scores ( $\beta=-0.35$ ; 95% CI -0.69,-0.01) and lower composite motor scores ( $\beta=-$   
54 0.58; 95% CI -0.93,-0.24). Physical IPV was associated with lower composite motor  
55  
56  
57  
58  
59  
60

1  
2  
3 scores ( $\beta=-0.42$ ; 95% CI -0.73,-0.11). Sexual IPV was not associated with any  
4  
5 composite developmental outcomes, Table 3.  
6

7  
8 Multivariable regression models were run to examine associations between IPV  
9  
10 and child developmental outcomes, adjusting for key potential confounding factors. IPV  
11  
12 sub-types were run separately in adjusted models due to collinearity and only where  
13  
14 significant in bivariate analyses. In adjusted models, the results held, recent emotional  
15  
16 IPV was associated with reduced scores across all developmental outcomes, specifically  
17  
18 with lower composite cognitive scores ( $\beta -0.32$ ; 95% CI -0.60,-0.04), language ( $\beta -0.35$ ;  
19  
20 95% CI -0.69, -0.01) and motor scores ( $\beta -0.58$ ; 95% CI -0.95, -0.20). Physical IPV was  
21  
22 associated with lower motor scores ( $\beta -0.42$ ; 95% CI -0.75, -0.09), Table 4. Associations  
23  
24 using the imputed dataset were similar for key exposures (IPV) and outcomes  
25  
26 (developmental), Supplemental Table 2 & 3.  
27  
28  
29  
30  
31  
32

### 33 *Hypothesized mediators*

34  
35 Current maternal depression and alcohol use were explored as potential  
36  
37 mediators in the relationship between recent IPV sub-types and developmental  
38  
39 outcomes. In correlational analyses, both maternal depression and alcohol use were  
40  
41 positively associated with emotional as well as physical IPV (Supplemental Table 4).  
42  
43 However, when linear regressions were run investigating associations between  
44  
45 mediators and developmental outcomes, adjusted for potential confounding factors, we  
46  
47 found no evidence of associations between proposed mediators and each developmental  
48  
49 outcome (cognitive, language, motor), Supplemental Table 5. Therefore, formal  
50  
51 mediation analyses were not done.  
52  
53  
54  
55  
56  
57  
58  
59  
60

## Discussion

Our results show that recent maternal emotional IPV was associated with lower cognitive, language and motor scores and physical IPV with lower motor scores in children at 24 months. Further, we investigated the potential role of current maternal depression or alcohol use in this relationship. There was insufficient evidence that current maternal depression or alcohol use were explanatory factors in the relationship between IPV and child development at 2 years of age.

We found associations between emotional IPV and each developmental outcome investigated, which are novel findings in such young children. Though there is limited research in this age group, and existing studies use differing definitions of IPV, a recent study pooling data from 11 LMICs investigating pre-school development (36-59 months) found associations between all IPV sub-types and developmental outcomes.<sup>52</sup> Where investigated in a younger sample, studies have found a link between IPV and early life development. However, few investigated IPV sub-types as separate risk factors for poor development. For example, a US study, investigating the impact of IPV on developmental outcomes at two years reported an increased risk of language and neurological delay in infants and toddlers, however this was not analysed by IPV sub-type but rather a composite measure of emotional, physical and sexual IPV.<sup>12</sup> A Tanzanian study through three years of age found both maternal lifetime physical and lifetime sexual IPV to be associated with reduced motor skills, expressive and receptive communication and cognitive development.<sup>13</sup> Emotional IPV was not included in their IPV measure. One study that did investigate emotional IPV separately as a risk factor for cognitive and language delay, only found associations with postnatal physical IPV and only in unadjusted analyses. The limited sample size (n=72) may have reduced statistical power to detect an association.<sup>53</sup> In the current study, sexual IPV was not

1  
2  
3 associated in unadjusted or adjusted analyses with the outcomes investigated, but this  
4  
5 is likely due to insufficient power to detect an association given the relatively low  
6  
7 prevalence of recent sexual IPV in our study population (4%). In the current study,  
8  
9 maternal emotional IPV as compared to physical IPV was more consistently associated  
10  
11 with poorer developmental outcomes. These results indicate that emotional IPV may  
12  
13 carry a unique risk for poor child developmental outcomes in early life in our setting.  
14  
15

16  
17 Given the high prevalence of emotional IPV and that it is often not as readily  
18  
19 recognised or included in research, intervention or policy efforts aimed at prevention  
20  
21 of IPV, it is critical to better understand its distinct impact on child health outcomes.  
22  
23 Our findings suggest that adverse outcomes and their association with maternal IPV  
24  
25 may be underestimated when IPV exposure is not considered broadly and inclusive of  
26  
27 emotional IPV, a potentially significant gap in the literature. Emotional abuse in a  
28  
29 current or past intimate relationships is increasingly being recognized as a unique  
30  
31 contributing factor to maternal ill-health outcomes.<sup>18-20</sup> Specifically, emotional IPV has  
32  
33 been linked to poor mental health, post traumatic stress disorder and poorer physical  
34  
35 health, sometimes above that of physical IPV.<sup>19,54</sup> Psychological control or abuse by a  
36  
37 partner may uniquely impact maternal efficacy, independence and diminish maternal  
38  
39 power within the family, which may affect her ability to provide nutritious food, a  
40  
41 secure environment or to have positive parenting practices, all of which could lead to  
42  
43 increased risk of negative outcomes for her children. These factors may be particularly  
44  
45 influential for health outcomes in settings such as South Africa where entrenched  
46  
47 gender norms and a high acceptability of violence contribute to high levels of IPV.<sup>24</sup>  
48  
49  
50  
51  
52

53  
54 Our investigation of potential mediators found little evidence to support that  
55  
56 current maternal depression symptoms or reported alcohol use were explanatory factors  
57  
58 for the impact of IPV on child development at two years. In the parent study we have  
59  
60

1  
2  
3 previously found that IPV is linked to longitudinal maternal depression<sup>20</sup> as well as  
4 hazardous alcohol use in pregnancy.<sup>55</sup> In the current study, we found that IPV was  
5 associated with depression and alcohol use at 2 years. However, these did not appear to  
6 be associated with development at 2 years. Recent maternal depression or alcohol use  
7 may compromise the quality of parenting or parent-child attachment, may divert  
8 household financial resources and decrease maternal care-seeking behaviours, which in  
9 turn may compromise child development. Though there is much literature linking  
10 maternal substance use to adverse child outcomes, some studies that have investigated  
11 its impact on parenting or secure attachment have found mixed results.<sup>56,57</sup> For example,  
12 a study assessing maternal substance use and quality of caregiving found no differences  
13 between substance abusing and non-substance abusing mothers and caregiving or  
14 maternal-child attachment at 12 months.<sup>56</sup> Similarly, studies investigating maternal  
15 depression and child development have shown mixed findings.<sup>13,58,59</sup> A Tanzanian  
16 study investigating depression and toddler development, found that depression was  
17 associated with receptive language and motor development but not cognitive or  
18 expressive language.<sup>13</sup> Another study found that maternal depression at 7 weeks  
19 postpartum impacted development at 3 months but this relationship attenuated by 6  
20 months.<sup>58</sup> Our findings may be influenced by relatively low levels of probable clinical  
21 depression (11%) or moderate-high alcohol-related risk (10%), diluting possible  
22 associations. We found no evidence that recent maternal depression or alcohol use  
23 influenced the relationship between IPV and early life development; these findings may  
24 illustrate the complexity of the relationship between the factors explored and other  
25 adverse environmental risks which often co-occur and may be underlying these  
26 relationships.  
27  
28  
29  
30  
31  
32  
33  
34  
35  
36  
37  
38  
39  
40  
41  
42  
43  
44  
45  
46  
47  
48  
49  
50  
51  
52  
53  
54  
55  
56  
57  
58  
59  
60

1  
2  
3 The prospective nature of the parent study, including measurement of a broad  
4 range of risk factors and robust measurement of developmental outcomes in an LMIC  
5 setting, is a strength of this study. However, there are several limitations. The current  
6 study used cross sectional data, therefore we cannot assert causality. Maternal sexual  
7 IPV prevalence was very low in our sample (4%) and this likely affected power to  
8 discern potential associations. We also did not investigate longitudinal exposures or  
9 cumulative impact of maternal depression or alcohol use; these were only investigated  
10 as recent exposures. Further, although the BSID-III is a well recognised tool, further  
11 standardisation in sub-Saharan African settings is required. For example, the  
12 categorisation of delay is based on scaled scores using normative US data that might  
13 not be generalisable to a South African population. However, our data from the parent  
14 study has shown that raw scores have similar patterns to the results based on delay  
15 categorisation. There were some differences in characteristics of those included versus  
16 excluded in the present study, namely HIV exposure and maternal employment.  
17 Maternal employment was lower in the included sub-sample (41% vs 51%), however,  
18 household income was similar across groups. Furthermore, maternal employment was  
19 not associated with any outcomes investigated in bivariate analyses and adjustment for  
20 this did not alter any of the key associations. HIV exposure was higher in the included  
21 sub-sample (24% versus 18%), however, this would likely bolster potential  
22 associations. In addition, approximately one-third of children who were still active in  
23 the study at two years were not included in the analysis due to incomplete data.  
24 However, results were similar when associations were explored in the imputed dataset.

### 25 *Conclusions*

26 In summary, our results highlight the need for programs that aim to reduce IPV  
27 as well as early life prevention efforts to mitigate the impact of maternal IPV on  
28  
29  
30  
31  
32  
33  
34  
35  
36  
37  
38  
39  
40  
41  
42  
43  
44  
45  
46  
47  
48  
49  
50  
51  
52  
53  
54  
55  
56  
57  
58  
59  
60

1  
2  
3 children. Maternal IPV was a consistent predictor of poor child developmental  
4 outcomes; furthermore, emotional IPV emerged as a uniquely deleterious risk factor  
5 for child developmental outcomes. Further work is needed to understand the  
6 mechanisms underlying this relationship, exploring maternal depression and alcohol  
7 use in other samples as well as additional potential mechanisms. Given our findings, it  
8 is important for public health professionals and policy makers to ensure that maternal  
9 emotional IPV is included in training programs for health care staff as well as in  
10 screening and referral efforts. Lastly, more research investigating emotional or  
11 psychological IPV and adverse health outcomes is needed. Critically, in our setting, the  
12 majority of pregnant and early postpartum women access healthcare, providing an  
13 important, potentially under-utilized opportunity to intervene early to attempt to shield  
14 children from the negative effects of IPV.  
15  
16  
17  
18  
19  
20  
21  
22  
23  
24  
25  
26  
27  
28  
29

### 30 31 32 *Data sharing*

33  
34 Collaborations for the analysis of data are welcome; the parent study has a large  
35 and active group of investigators and postgraduate students and many have successfully  
36 partnered with students or researchers from other institutions. Researchers who are  
37 interested in datasets or collaborations can find more information on our website  
38 [<http://www.paediatrics.uct.ac.za/scah/dclhs>].  
39  
40  
41  
42  
43  
44  
45  
46  
47

### 48 49 *Competing interests*

50 The authors have no conflicts of interest to declare.  
51  
52

### 53 54 *Author contributions*

55  
56 WB, KD and SH conceptualized the study aims and methodology. WB with guidance  
57 from RM, conducted all analyses. HJZ is principal investigator of the parent study; DS  
58  
59  
60



1  
2  
3 and NH lead the psychosocial study aspects; CW and KD are coinvestigators and were  
4 responsible for implementation, training and quality control of developmental  
5 assessments. All authors provided intellectual input and reviewed and approved the  
6 final manuscript.  
7  
8  
9  
10  
11  
12  
13  
14

15 *Ethical approval statement*

16  
17 Ethical approval was obtained from the Faculty of Health Sciences Research Ethics  
18 Committee, University of Cape Town (401/2009) and the Western Cape Provincial  
19 Research committee.  
20  
21  
22  
23  
24  
25  
26  
27  
28  
29  
30  
31  
32  
33  
34  
35  
36  
37  
38  
39  
40  
41  
42  
43  
44  
45  
46  
47  
48  
49  
50  
51  
52  
53  
54  
55  
56  
57  
58  
59  
60

## References

1. World Health Organization. 2005. WHO *Multi-country Study on Women's Health and Domestic Violence against Women*. Retrieved 26 April 2021, from [https://www.who.int/gender/violence/who\\_multicountry\\_study/summary\\_report/summary\\_report\\_English2.pdf](https://www.who.int/gender/violence/who_multicountry_study/summary_report/summary_report_English2.pdf).
2. Decker MR, Peitzmeier S, Olumide A, et al. Prevalence and Health Impact of Intimate Partner Violence and Non-partner Sexual Violence Among Female Adolescents Aged 15-19 Years in Vulnerable Urban Environments: A Multi-Country Study. *J Adolesc Health* 2014; **55**(6 Suppl): S58-67.
3. Davis EC, Rotheram-Borus MJ, Weichle TW, Rezai R, Tomlinson M. Patterns of Alcohol Abuse, Depression, and Intimate Partner Violence Among Township Mothers in South Africa Over 5 Years. *AIDS Behav* 2017; **21**(Suppl 2): 174-82.
4. Devries KM, Knight L, Child JC, et al. Witnessing intimate partner violence and child maltreatment in Ugandan children: a cross-sectional survey. *BMJ Open* 2017; **7**(2): e013583.
5. Carlson C, Namy S, Norcini Pala A, et al. Violence against children and intimate partner violence against women: overlap and common contributing factors among caregiver-adolescent dyads. *BMC Public Health* 2020; **20**(1): 124.
6. Pinheiro, P. S. *World Report on Violence Against Children* (United Nations, Geneva, 2006). Retrieved 28 Apr 2020, from [https://www.unicef.org/violencestudy/reports/SG\\_violencestudy\\_en.pdf](https://www.unicef.org/violencestudy/reports/SG_violencestudy_en.pdf).
7. Vu NL, Jouriles EN, McDonald R, Rosenfield D. Children's exposure to intimate partner violence: A meta-analysis of longitudinal associations with child adjustment problems. *Clin Psychol Rev* 2016; **46**: 25-33.
8. Bair-Merritt MH, Blackstone M, Feudtner C. Physical health outcomes of childhood exposure to intimate partner violence: a systematic review. *Pediatrics* 2006; **117**(2): e278-90.
9. Kiesel LR, Piescher KN, Edleson JL. The Relationship Between Child Maltreatment, Intimate Partner Violence Exposure, and Academic Performance. *J Public Child Welf* 2016; **10**(4): 434-56.
10. Gale CR, Cooper R, Craig L, et al. Cognitive function in childhood and lifetime cognitive change in relation to mental wellbeing in four cohorts of older people. *PLoS One* 2012; **7**(9): e44860.
11. Howell KH, Barnes SE, Miller LE, Graham-Bermann SA. Developmental variations in the impact of intimate partner violence exposure during childhood. *J Inj Violence Res* 2016; **8**(1): 43-57.
12. Udo IE, Sharps P, Bronner Y, Hossain MB. Maternal Intimate Partner Violence: Relationships with Language and Neurological Development of Infants and Toddlers. *Matern Child Health J* 2016; **20**(7): 1424-31.
13. Neamah HH, Sudfeld C, McCoy DC, et al. Intimate Partner Violence, Depression, and Child Growth and Development. *Pediatrics* 2018; **142**(1).
14. Shonkoff JP, Garner AS. The lifelong effects of early childhood adversity and toxic stress. *Pediatrics* 2012; **129**(1): e232-46.
15. Enlow MB, Egeland B, Blood EA, Wright RO, Wright RJ. Interpersonal trauma exposure and cognitive development in children to age 8 years: a longitudinal study. *J Epidemiol Community Health* 2012; **66**(11): 1005-10.
16. Kliem S, Kirchmann-Kallas S, Stiller A, Jungmann T. [Impact of Intimate Partner Violence on Child's Cognitive Development - Results from the

- 1  
2  
3  
4 Evaluation of the Home Visiting Program "Pro Kind"]. *Prax Kinderpsychol*  
5 *Kinderpsychiatr* 2019; **68**(1): 63-80.
- 6 17. Kramer A, Lorenzon D, Mueller G. Prevalence of intimate partner violence and  
7 health implications for women using emergency departments and primary care  
8 clinics. *Womens Health Issues* 2004; **14**(1): 19-29.
- 9 18. Yoshihama M, Horrocks J, Kamano S. The role of emotional abuse in intimate  
10 partner violence and health among women in Yokohama, Japan. *Am J Public*  
11 *Health* 2009; **99**(4): 647-53.
- 12 19. Coker AL, Davis KE, Arias I, et al. Physical and mental health effects of  
13 intimate partner violence for men and women. *Am J Prev Med* 2002; **23**(4):  
14 260-8.
- 15 20. Okafor CN, Barnett W, Zar HJ, et al. Associations of Emotional, Physical, or  
16 Sexual Intimate Partner Violence and Depression Symptoms Among South  
17 African Women in a Prospective Cohort Study. *J Interpers Violence* 2018:  
18 886260518796522.
- 19 21. Yount KM, DiGirolamo AM, Ramakrishnan U. Impacts of domestic violence  
20 on child growth and nutrition: a conceptual review of the pathways of influence.  
21 *Soc Sci Med* 2011; **72**(9): 1534-54.
- 22 22. Norman R, Schneider M, Bradshaw D, et al. Interpersonal violence: an  
23 important risk factor for disease and injury in South Africa. *Popul Health Metr*  
24 2010; **8**: 32.
- 25 23. Coovadia H, Jewkes R, Barron P, Sanders D, McIntyre D. The health and health  
26 system of South Africa: historical roots of current public health challenges.  
27 *Lancet* 2009; **374**(9692): 817-34.
- 28 24. Zembe YZ, Townsend L, Thorson A, Silberschmidt M, Ekstrom AM. Intimate  
29 Partner Violence, Relationship Power Inequity and the Role of Sexual and  
30 Social Risk Factors in the Production of Violence among Young Women Who  
31 Have Multiple Sexual Partners in a Peri-Urban Setting in South Africa. *PLoS*  
32 *One* 2015; **10**(11): e0139430.
- 33 25. Atkinson L, Paglia A, Coolbear J, Niccols A, Parker KC, Guger S. Attachment  
34 security: a meta-analysis of maternal mental health correlates. *Clin Psychol Rev*  
35 2000; **20**(8): 1019-40.
- 36 26. Myers B. LJ, Fakier N. Access to substance abuse treatment in the Cape Town  
37 Metropole: Final report. *South African Medical Research Council* 2007.
- 38 27. Jester JM, Jacobson SW, Sokol RJ, Tuttle BS, Jacobson JL. The influence of  
39 maternal drinking and drug use on the quality of the home environment of  
40 school-aged children. *Alcohol Clin Exp Res* 2000; **24**(8): 1187-97.
- 41 28. Jansson LM. Maternal Alcohol Use During Lactation and Child Development.  
42 *Pediatrics* 2018; **142**(2).
- 43 29. Rochat TJ, Houle B, Stein A, Mitchell J, Bland RM. Maternal alcohol use and  
44 children's emotional and cognitive outcomes in rural South Africa. *S Afr Med J*  
45 2019; **109**(7): 526-34.
- 46 30. Barnes J, Theule J. Maternal depression and infant attachment security: A meta-  
47 analysis. *Infant Ment Health J* 2019; **40**(6): 817-34.
- 48 31. National Research Council (US) and Institute of Medicine (US) Committee on  
49 Depression, Parenting Practices, and the Healthy Development of Children.  
50 *Depression in Parents, Parenting, and Children: Opportunities to Improve*  
51 *Identification, Treatment, and Prevention*. 2009. Retrieved 10 Jul 2020, from:  
52 <https://www.ncbi.nlm.nih.gov/books/NBK215128/>.
- 53  
54  
55  
56  
57  
58  
59  
60

- 1
  - 2
  - 3
  - 4
  - 5
  - 6
  - 7
  - 8
  - 9
  - 10
  - 11
  - 12
  - 13
  - 14
  - 15
  - 16
  - 17
  - 18
  - 19
  - 20
  - 21
  - 22
  - 23
  - 24
  - 25
  - 26
  - 27
  - 28
  - 29
  - 30
  - 31
  - 32
  - 33
  - 34
  - 35
  - 36
  - 37
  - 38
  - 39
  - 40
  - 41
  - 42
  - 43
  - 44
  - 45
  - 46
  - 47
  - 48
  - 49
  - 50
  - 51
  - 52
  - 53
  - 54
  - 55
  - 56
  - 57
  - 58
  - 59
  - 60
32. Callo-Quinte G, Del-Ponte B, Ruivo ACO, et al. Maternal depression symptoms and use of child health-care services at The Pelotas 2004 Birth Cohort. *J Affect Disord* 2019; **253**: 303-7.
33. Kitzmann KM, Gaylord NK, Holt AR, Kenny ED. Child witnesses to domestic violence: a meta-analytic review. *J Consult Clin Psychol* 2003; **71**(2): 339-52.
34. Stein DJ, Koen N, Donald KA, et al. Investigating the psychosocial determinants of child health in Africa: The Drakenstein Child Health Study. *J Neurosci Methods* 2015; Aug **30**;252:27-35. doi: 10.1016/j.jneumeth.2015.03.016.
35. Zar HJ, Barnett W, Myer L, Stein DJ, Nicol MP. Investigating the early-life determinants of illness in Africa: the Drakenstein Child Health Study. *Thorax* 2015; **70**(6): 592-4.
36. Donald KA, Hoogenhout M, du Plooy CP, et al. Drakenstein Child Health Study (DCHS): investigating determinants of early child development and cognition. *BMJ Paediatr Open* 2018; **2**(1): e000282.
37. Myer L, Stein DJ, Grimsrud A, Seedat S, Williams DR. Social determinants of psychological distress in a nationally-representative sample of South African adults. *Soc Sci Med* 2008; **66**(8): 1828-40.
38. Pellowski J, Wedderburn C, Stadler JAM, et al. Implementation of prevention of mother-to-child transmission (PMTCT) in South Africa: outcomes from a population-based birth cohort study in Paarl, Western Cape. *BMJ Open* 2019; **9**(12): e033259.
39. Budree S, Stein DJ, Brittain K, et al. Maternal and infant factors had a significant impact on birthweight and longitudinal growth in a South African birth cohort. *Acta Paediatr* 2017; **106**(11): 1793-801.
40. Shamu S, Abrahams N, Zarowsky C, Shefer T, Temmerman M. Intimate partner violence during pregnancy in Zimbabwe: a cross-sectional study of prevalence, predictors and associations with HIV. *Trop Med Int Health* 2013; **18**(6): 696-711.
41. Dunkle KL, Jewkes RK, Brown HC, Gray GE, McIntyre JA, Harlow SD. Gender-based violence, relationship power, and risk of HIV infection in women attending antenatal clinics in South Africa. *Lancet* 2004.
42. Beck AT, Steer RA, Carbin MG. Psychometric properties of the Beck Depression Inventory: Twenty-five years of evaluation. *Clin Psychol Rev* 1988; **8**(1): 77-100.
43. Kagee A, Nel A, Saal W. Factor structure of the Beck Depression Inventory-II among South Africans receiving antiretroviral therapy. *AIDS Care* 2014; **26**(2): 257-62.
44. Lasa L, Ayuso-Mateos JL, Vázquez-Barquero JL, Díez-Manrique FJ, Dowrick CF. The use of the Beck Depression Inventory to screen for depression in the general population: a preliminary analysis. *J Affect Disord* 2000; **57**(1-3): 261-5.
45. Humeniuk R, Ali R, Babor TF, et al. Validation of the Alcohol, Smoking And Substance Involvement Screening Test (ASSIST). *Addiction* 2008; **103**(6): 1039-47.
46. World Health Organization. 2010. *The Alcohol, Smoking and Substance Involvement Screening Test (ASSIST) Manual for use in primary care*. Retrieved 28 June 2020, from [http://www.who.int/substance\\_abuse/publications/assist/en/](http://www.who.int/substance_abuse/publications/assist/en/).

- 1
  - 2
  - 3
  - 4
  - 5
  - 6
  - 7
  - 8
  - 9
  - 10
  - 11
  - 12
  - 13
  - 14
  - 15
  - 16
  - 17
  - 18
  - 19
  - 20
  - 21
  - 22
  - 23
  - 24
  - 25
  - 26
  - 27
  - 28
  - 29
  - 30
  - 31
  - 32
  - 33
  - 34
  - 35
  - 36
  - 37
  - 38
  - 39
  - 40
  - 41
  - 42
  - 43
  - 44
  - 45
  - 46
  - 47
  - 48
  - 49
  - 50
  - 51
  - 52
  - 53
  - 54
  - 55
  - 56
  - 57
  - 58
  - 59
  - 60
47. Bayley N. Pearson; Bloomington, MN: 2006. Bayley scales of infant and toddler development, 3rd edition-technical manual.
48. Rademeyer V, Jacklin L. A study to evaluate the performance of black South African urban infants on the Bayley Scales of Infant Development III. *SA J Child Health* 2013; **7**: 54-9.
49. Barnett W, Brittain K, Sorsdahl K, Zar HJ, Stein DJ. Maternal participant experience in a South African birth cohort study enrolling healthy pregnant women and their infants. *Philos Ethics Humanit Med* 2016; **11**(1): 3.
50. Villar J, Papageorgiou AT, Pang R, et al. The likeness of fetal growth and newborn size across non-isolated populations in the INTERGROWTH-21st Project: the Fetal Growth Longitudinal Study and Newborn Cross-Sectional Study. *Lancet Diabetes Endocrinol* 2014; **2**(10): 781-92.
51. World Health Organization. 2006. *WHO Child Growth Standards: length/height-for-age, weight-for-age, weight-for-length, weight-for-height and body mass index-for-age: methods and development*. Geneva: World Health Organization. *Acta Paediatr Suppl*, 2006; 450: 76–85.52.
52. Jeong J, Adhia A, Bhatia A, McCoy DC, Yousafzai AK. Intimate Partner Violence, Maternal and Paternal Parenting, and Early Child Development. *Pediatrics* 2020; **145**(6): e20192955.
53. Rodriguez VJ, Peltzer K, Matseke G, Weiss SM, Shine A, Jones DL. Pre- and postnatal exposure to intimate partner violence among South African HIV-infected mothers and infant developmental functioning at 12 months of age. *Arch Womens Ment Health* 2018; **21**(6): 707-13.
54. Tiwari A, Chan K, Fong D, et al. The impact of psychological abuse by an intimate partner on the mental health of pregnant women. *Bjog* 2008; **115**(3): 377-84.
55. Myers B, Koen N, Donald KA, et al. Effect of Hazardous Alcohol Use During Pregnancy on Growth Outcomes at Birth: Findings from a South African Cohort Study. *Alcohol Clin Exp Res* 2018; **42**(2): 369-77.
56. Bergin C, McCollough P. Attachment in substance-exposed toddlers: The role of caregiving and exposure. *Infant Ment Health J* 2009; **30**(4): 407-23.
57. Eiden RD, Edwards EP, Leonard KE. Mother-infant and father-infant attachment among alcoholic families. *Dev Psychopathol* 2002; **14**(2): 253-78.
58. Galler JR, Harrison RH, Ramsey F, Forde V, Butler SC. Maternal depressive symptoms affect infant cognitive development in Barbados. *J Child Psychol Psychiatry* 2000; **41**(6): 747-57.
59. Morais MdLSe, Lucci TK, Otta E. Postpartum depression and child development in first year of life. *Estudos de Psicologia (Campinas)* 2013; **30**: 7-17.

**Table 1.** Sample maternal and child psychosocial, demographic and clinical characteristics, n=626\*

|                                                      | Total<br>n=626       |
|------------------------------------------------------|----------------------|
| Intimate Partner Violence (24 months)                |                      |
| Emotional score, median (IQR)                        | 0 (0, 0)             |
| Emotional (above threshold), n (%)                   | 102 (16)             |
| Physical score, median (IQR)                         | 0 (0, 0)             |
| Physical (above threshold), n (%)                    | 107 (17)             |
| Sexual score, median (IQR)                           | 0 (0, 0)             |
| Sexual (above threshold), n (%)                      | 25 (4)               |
| Any sub-type score, median (IQR)                     | 0 (0,0)              |
| Any sub-type (above threshold), n (%)                | 138 (22)             |
| Sociodemographics (24 months)                        |                      |
| Maternal education (secondary not completed), n (%)  | 233 (37)             |
| Mother employed, n (%)                               | 225/545 (41)         |
| Mother married/partnered, n (%)                      | 268/544 (49)         |
| Household Income                                     |                      |
| <R5,000 (approximately 300 USD), n (%)               | 445/609 (73)         |
| >R5,000, n (%)                                       | 164/609 (27)         |
| Recruitment site: TC Newman, n (%)                   | 274 (44)             |
| Physical variables                                   |                      |
| Birth weight z-score, median (IQR)**                 | -0.59 (-1.34, 0.16)  |
| Child age at assessment (months), median (IQR)       | 24.05 (23.79, 24.31) |
| HIV exposed**, n (%)                                 | 153 (24)             |
| Length for age z-score at 24 months, median (IQR)    | -1.16 (-1.89, -0.52) |
| Weight for age z-score at 24 months, median (IQR)    | -0.31 (-1.10, 0.43)  |
| Weight for length z-score at 24 months, median (IQR) | 0.28 (-0.48, 1.21)   |
| Psychosocial variables (24 months)                   |                      |
| Depression score, median (IQR)                       | 0 (0, 3)             |
| Depression (above threshold), n (%)                  | 36/591 (6)           |
| Alcohol dependence score, median (IQR)               | 0 (0, 0)             |
| Alcohol dependence (categories)                      |                      |
| Low dependence, n (%)                                | 160/593 (27)         |
| Moderate dependence, n (%)                           | 33/593 (6)           |
| High dependence, n (%)                               | 22/593 (4)           |

Notes: Median (IQR) ranges reported for anthropometry data, intimate partner violence scores as well as depression and alcohol scores. Frequencies (percentages) reported for all other variables. All percentages calculated on non-missing values. N values are indicated where the number of participants with available data differs from the total group (n=626). Intimate partner violence, above threshold exposure defined as more than an isolated incident within each sub-type. Depression threshold defined as BDI score of  $\geq 20$ . Alcohol dependence categories defined as: low/no risk (0-10), moderate risk (11-26) and high risk ( $>26$ ), with the likelihood of alcohol dependence.

\*Includes data from mothers or children included in complete case dataset.

\*\*Birthweight and HIV exposure collected at birth; all other variables collected at 2 years of child age.



**Table 2.** Developmental outcomes of children at 2 years of age by child sex

|                               | Total         | Female        | Male          | p-value |
|-------------------------------|---------------|---------------|---------------|---------|
| <i>Sample</i>                 | <i>n=625</i>  | <i>n=303</i>  | <i>n=322</i>  |         |
| Cognitive scores, mean (SD)   | 85.74 (8.84)  | 86.44 (8.56)  | 85.08 (9.06)  | 0.035   |
| Cognitive categories          |               |               |               |         |
| No delay, n (%)               | 424 (68)      | 218 (72)      | 206 (64)      |         |
| Suboptimal development, n (%) | 173 (28)      | 75 (25)       | 98 (30)       |         |
| Delayed, n (%)                | 28 (4)        | 10 (3)        | 18 (6)        | 0.078   |
| <i>Sample</i>                 | <i>n=598</i>  | <i>n=289</i>  | <i>n=309</i>  |         |
| Language scores, mean (SD)    | 84.45 (11.39) | 86.57 (11.35) | 82.47 (11.08) | <0.001  |
| Language categories           |               |               |               |         |
| No delay, n (%)               | 297 (50)      | 164 (57)      | 133 (43)      |         |
| Suboptimal development, n (%) | 253 (42)      | 110 (38)      | 143 (46)      |         |
| Delayed, n (%)                | 48 (8)        | 15 (5)        | 33 (11)       | 0.001   |
| <i>Sample</i>                 | <i>n=592</i>  | <i>n=289</i>  | <i>n=303</i>  |         |
| Motor scores, mean (SD)       | 93.62 (11.89) | 94.40 (12.12) | 92.86 (11.63) | 0.111   |
| Motor categories              |               |               |               |         |
| No delay, n (%)               | 490 (83)      | 243 (84)      | 247 (82)      |         |
| Suboptimal development, n (%) | 95 (16)       | 41 (14)       | 54 (18)       |         |
| Delayed, n (%)                | 7 (1)         | 5 (2)         | 2 (1)         | 0.251   |

Continuous composite scores are presented as mean (SD). Categorical data presented as frequencies (percentages). Categories were defined as 'delay' (<2 standard deviations below mean), 'suboptimal development' (<1 standard deviation below mean) and 'no delay'. P-values presented are comparing sex differences.

**Table 3.** Univariate associations between intimate partner violence, covariates and proposed mediators and composite scores for developmental domains in complete case analysis.

|                                              | Composite Cognitive<br>(n=549)<br>Unadjusted<br>Coefficient (95% CI) | Composite Language<br>(n=598)<br>Unadjusted<br>Coefficient (95% CI) | Composite Motor<br>(n=521)<br>Unadjusted<br>Coefficient (95%<br>CI) |
|----------------------------------------------|----------------------------------------------------------------------|---------------------------------------------------------------------|---------------------------------------------------------------------|
| Intimate Partner Violence (IPV)              |                                                                      |                                                                     |                                                                     |
| Emotional IPV score                          | -0.32 (-0.58, -0.06)*                                                | -0.35 (-0.69, -0.01)*                                               | -0.58 (-0.93, -0.24)*                                               |
| Physical IPV score                           | -0.18 (-0.42, 0.05)                                                  | -0.23 (-0.54, 0.08)                                                 | -0.42 (-0.73, -0.11)*                                               |
| Sexual IPV score                             | -0.15 (-0.97, 0.67)                                                  | -0.16 (-1.29, 0.97)                                                 | -0.49 (-1.63, 0.65)                                                 |
| Sociodemographics                            |                                                                      |                                                                     |                                                                     |
| Maternal education (not completed secondary) | -1.31 (-2.70, 0.08)                                                  | -2.86 (-4.61, -1.11)*                                               | -0.93 (-2.78, 0.92)                                                 |
| Mother employed                              | 0.60 (-0.87, 2.08)                                                   | 0.34 (-1.57, 2.27)                                                  | 0.68 (-1.29, 2.65)                                                  |
| Mother married/partnered                     | -0.52 (-1.98, 0.93)                                                  | 0.47 (-1.43, 2.37)                                                  | 0.01 (-1.94, 1.95)                                                  |
| Household Income<br>>R5000                   | 0.73 (-0.92, 2.38)                                                   | 0.32 (-1.80, 2.45)                                                  | 1.63 (-0.55, 3.82)                                                  |
| Recruitment site: TC Newman                  | 1.19 (-0.16, 2.53)                                                   | 3.05 (1.35, 4.76)**                                                 | 1.13 (-0.66, 2.93)                                                  |
| Physical variables                           |                                                                      |                                                                     |                                                                     |
| Birth weight z-score                         | 0.42 (-0.17, 1.01)                                                   | 0.84 (0.09, 1.58)*                                                  | 0.62 (-0.17, 1.39)                                                  |
| Male                                         | -1.66 (-3.01, -0.32)*                                                | -4.27 (-5.96, -2.59)**                                              | -1.52 (-3.31, 0.27)                                                 |
| Child age (months)                           | -0.94 (-2.23, 0.34)                                                  | -0.10 (-1.74, 1.53)                                                 | -2.81 (-4.49, -1.12)*                                               |
| HIV exposed                                  | -1.71 (-3.30, -0.11)*                                                | -3.90 (-5.93, -1.87)**                                              | -0.76 (-2.89, 1.38)                                                 |
| Length for age z-score                       | 0.97 (0.36, 1.58)*                                                   | 0.77 (-0.01, 1.55)                                                  | 0.13 (-0.70, 0.97)                                                  |
| Weight for age z-score                       | 0.92 (0.32, 1.51)*                                                   | 0.64 (-0.12, 1.40)                                                  | 0.68 (-0.19, 1.47)                                                  |
| Weight for length z-score                    | 0.61 (0.02, 1.19)*                                                   | -0.34 (-0.41, 1.09)                                                 | 0.84 (0.05, 1.63)*                                                  |
| Proposed Psychosocial mediators              |                                                                      |                                                                     |                                                                     |
| Depression score                             | -0.02 (-0.11, 0.08)                                                  | -0.06 (-0.18, 0.06)                                                 | -0.12 (-0.25, 0.01)                                                 |
| Alcohol dependence score                     | -0.07 (-0.17, 0.03)                                                  | -0.03 (-0.16, 0.11)                                                 | 0.01 (-0.13, 0.15)                                                  |

Notes: All variables measured at 2 years of child age except birth weight, sex and HIV-exposure which were captured at birth. IPV sub-types, depression and alcohol dependence were included as continuous variables in all models.

Abbreviations: IPV=intimate partner violence.

\*p<0.05; \*\*p<0.001;



**Table 4.** Multivariable linear regression demonstrating the adjusted association of intimate partner violence and composite scores for developmental domains in complete case analysis sample.

|                     | <b>Composite Cognitive<br/>(n=549)</b> | <b>Composite Language<br/>(n=598)</b> | <b>Composite Motor<br/>(n=521)</b> |                       |
|---------------------|----------------------------------------|---------------------------------------|------------------------------------|-----------------------|
|                     | Adjusted <sup>#</sup>                  | Adjusted <sup>^</sup>                 | Adjusted <sup>+</sup>              | Adjusted <sup>+</sup> |
|                     | Coefficient (95% CI)                   | Coefficient (95% CI)                  | Coefficient (95% CI)               | Coefficient (95% CI)  |
| Emotional IPV score | -0.32 (-0.60, -0.04)*                  | -0.35 (-0.69, -0.01)*                 | -0.58 (-0.95, -0.20)*              |                       |
| Physical IPV score  |                                        |                                       | -0.42 (-0.75, -0.09)*              |                       |

Adjusted models were run only where IPV sub-type was associated with outcome explored ( $p < 0.05$ ) in bivariate analyses. For cognitive and language scores, only emotional IPV was associated in bivariate analyses and therefore run in multivariable models. Due to collinearity, emotional and physical IPV were run in separate multivariable models for motor development. IPV sub-types, depression and alcohol dependence were included as continuous variables in all models.

Abbreviations: IPV=intimate partner violence.

\* $p < 0.05$ ; \*\* $p < 0.001$

<sup>#</sup>Adjusted for child sex, HIV exposure, length-for-age z-scores, weight-for-age z-scores and weight-for-length z-scores at 24 months.

<sup>^</sup>Adjusted for maternal education, recruitment site, weight-for-age z-score at birth, child sex and HIV exposure.

<sup>+</sup>Adjusted for child age at assessment and weight-for-length z-scores at 24 months.

**Supplemental Table 1.** Comparison of psychosocial, demographic and clinical data between children included in complete case developmental models and those who are not.

|                                                 | In Development models | Not in Development model | p-value |
|-------------------------------------------------|-----------------------|--------------------------|---------|
| Intimate Partner Violence (IPV)                 |                       |                          |         |
| Emotional IPV score, median (IQR)               | 0 (0, 0)              | 0 (0, 0)                 | 0.669   |
| Physical IPV score, median (IQR)                | 0 (0, 0)              | 0 (0, 0)                 | 0.213   |
| Sexual IPV score, median (IQR)                  | 0 (0, 0)              | 0 (0, 0)                 | 0.160.  |
| Sociodemographics                               |                       |                          |         |
| Maternal education (did not complete secondary) | 393 (63)              | 302 (58)                 | 0.132   |
| Mother employed                                 | 225 (41)              | 99 (51)                  | 0.022*  |
| Mother married/partnered                        | 268 (49)              | 99 (51)                  | 0.718   |
| Household Income                                |                       |                          |         |
| <R5000                                          | 445 (73)              | 122 (63)                 | 0.671   |
| >R5000                                          | 164 (27)              | 47 (24)                  |         |
| Recruitment site: TC Newman                     | 274 (44)              | 235 (45)                 | 0.586   |
| Physical variables                              |                       |                          |         |
| Birth weight z-score, median (IQR)              | -0.59 (-1.34, 0.16)   | -0.51 (-1.22, -0.00)     | 0.744   |
| Male sex                                        | 321 (51)              | 269 (52)                 | 0.774   |
| HIV exposed                                     | 153 (24)              | 94 (18)                  | 0.010*  |
| Length for age z-scores, median (IQR)           | -1.10 (-1.80, -0.34)  | -1.03 (-1.85, -0.28)     | 0.846   |
| Weight for age z-scores, median (IQR)           | -0.31 (-1.10, 0.43)   | -0.24 (-1.01, 0.40)      | 0.6682  |
| Weight for length z-scores, median (IQR)        | 0.28 (-0.48, 1.13)    | 0.43 (-0.40, 1.09)       | 0.7542  |
| Psychosocial factors                            |                       |                          |         |
| Depression score, median (IQR)                  | 0 (0, 3)              | 0 (0, 5)                 | 0.415   |
| Alcohol dependence score, median (IQR)          | 0 (0,0)               | 0 (0,0)                  | 0.068   |

Data are presented as n(%) or median IQR). Birthweight and HIV exposure collected at birth; all other variables collected at 2 years of child age. Abbreviation: IPV=intimate partner violence.

\*p<0.05; \*\*p<0.001

**Supplemental Table 2.** Univariate associations between intimate partner violence, covariates and proposed mediators and composite scores for developmental domains in the multiple-imputation analysis sample.

|                                              | Composite Cognitive   | Composite Language     | Composite Motor       |
|----------------------------------------------|-----------------------|------------------------|-----------------------|
|                                              | Unadjusted            | Unadjusted             | Unadjusted            |
|                                              | Coefficient (95% CI)  | Coefficient (95% CI)   | Coefficient (95% CI)  |
| <b>Intimate Partner Violence (IPV)</b>       |                       |                        |                       |
| Emotional IPV score                          | -0.33 (-0.60, -0.06)* | -0.34 (-0.68, -0.01)*  | -0.51 (-0.86, -0.16)* |
| Physical IPV score                           | -0.19 (-0.43, 0.05)   | -0.20 (-0.50, 0.11)    | -0.39 (-0.70, -0.09)* |
| Sexual IPV score                             | -0.13 (-0.98, 0.71)   | -0.16 (-1.36, 1.04)    | -0.41 (-1.58, 0.75)   |
| <b>Sociodemographics</b>                     |                       |                        |                       |
| Maternal education (not completed secondary) | -1.31 (-2.69, 0.07)   | -3.20 (-4.94, -1.45)** | -1.45 (-3.30, 0.40)   |
| Mother employed                              | 0.48 (-1.02, 1.99)    | 0.13 (-1.81, 2.07)     | 0.41 (-1.55, 2.38)    |
| Mother married/partnered                     | -0.59 (-2.07, 0.89)   | 0.26 (-1.64, 2.16)     | 0.15 (-1.88, 2.18)    |
| Household Income                             |                       |                        |                       |
| >R5000                                       | 0.73 (-0.92, 2.38)    | 1.00 (-1.14, 3.13)     | 1.96 (-0.28, 4.20)    |
| TC Newman                                    | 1.20 (-0.15, 2.54)    | 3.12 (1.41, 4.84)**    | 0.89 (-0.91, 2.68)    |
| <b>Physical variables</b>                    |                       |                        |                       |
| Birth weight z-score                         | 0.44 (-0.15, 1.03)    | 0.68 (-0.07, 1.42)     | 0.58 (-0.21, 1.36)    |
| Male                                         | -1.67 (-3.01, -0.33)* | -4.07 (-5.77, -2.37)** | -1.70 (-3.49, 0.09)   |
| Child age (months)                           | -0.95 (-2.24, 0.33)   | -0.12 (-1.77, 1.53)    | -2.81 (-4.50, -1.11)* |
| HIV exposed                                  | -1.70 (-3.29, -0.10)* | -3.77 (-5.82, -1.72)** | -0.59 (-2.72, 1.54)   |
| Length for age z-score                       | 0.92 (0.33, 1.52)*    | 0.67 (-0.09, 1.42)     | 0.26 (-0.54, 1.06)    |
| Weight for age z-score                       | 0.84 (0.26, 1.43)*    | 0.64 (-0.10, 1.37)     | 0.82 (0.04, 1.60)*    |
| Weight for length z-score                    | 0.50 (-0.08, 1.08)    | 0.39 (-0.34, 1.11)     | 0.88 (0.10, 1.66)*    |
| <b>Proposed Psychosocial mediators</b>       |                       |                        |                       |
| Depression score                             | -0.02 (-0.12, 0.08)   | -0.06 (-0.18, 0.07)    | -0.11 (-0.24, 0.02)   |
| Alcohol dependence score                     | -0.08 (-0.19, 0.03)   | -0.03 (-0.17, 0.11)    | 0.03 (-0.11, 0.16)    |

Birthweight and HIV exposure collected at birth; all other variables collected at 2 years of child age. IPV sub-types, depression and alcohol dependence were included as continuous variables in all models.

Abbreviation: IPV= intimate partner violence.

\*p<0.05, \*\*p<0.001

**Supplemental Table 3.** Multivariable linear regression demonstrating the association of intimate partner violence with composite scores for developmental domains in the multiple-imputation analysis sample.

|                     | Cognitive scores      | Language scores      | Motor scores          |                      |
|---------------------|-----------------------|----------------------|-----------------------|----------------------|
|                     | Adjusted#             | Adjusted^            | Adjusted+             | Adjusted+            |
|                     | Coefficient (95% CI)  | Coefficient (95% CI) | Coefficient (95% CI)  | Coefficient (95% CI) |
| Emotional IPV score | -0.30 (-0.57, -0.03)* | -0.35 (-0.68, -0.01) | -0.52 (-0.87, -0.17)* |                      |
| Physical IPV score  |                       |                      | -0.39 (-0.70, -0.09)* |                      |

Adjusted models were run only where IPV sub-type was associated (p<0.05) with outcome explored in bivariate analyses. For cognitive and language scores, only emotional IPV was associated in bivariate analyses and therefore run in multivariable models. Due to collinearity, emotional and physical IPV were run in separate multivariable models for motor development. Adjusted models were run including same covariates as the complete case analysis, as noted below. IPV sub-types, depression and alcohol dependence were included as continuous variables in all models.

Abbreviations: IPV=intimate partner violence.

\*p<0.05; \*\*p<0.001

#Adjusted for child sex, HIV exposure, length-for-age z-scores, weight-for-age z-scores and weight-for-length z-scores at 24 months.

^Adjusted for maternal education, recruitment site, weight-for-age z-score at birth, child sex and HIV exposure.

+Adjusted for child age at assessment and weight-for-length z-scores at 24 months.

**Supplemental Table 4.** Univariate associations between proposed mediators and intimate partner violence in complete case sample.

|                          | <b>Emotional IPV</b><br>Coefficient (95% CI) | <b>Physical IPV</b><br>Coefficient (95% CI) |
|--------------------------|----------------------------------------------|---------------------------------------------|
| Depression score         | 1.01 (0.80, 1.22)**                          | 0.68 (0.49, 0.87)**                         |
| Alcohol dependence score | 0.34 (0.13, 0.56)*                           | 0.30 (0.12, 0.49)*                          |

IPV sub-types, depression and alcohol dependence were included as continuous variables in all models.

Abbreviation: IPV = intimate partner violence.

\*p<0.05, \*\*p<0.001

**Supplemental Table 5.** Univariate and adjusted associations between proposed mediators and developmental outcomes in complete case sample.

|            |            | <b>Cognitive scores<sup>#</sup></b><br>Coefficient (95% CI) | <b>Language scores<sup>^</sup></b><br>Coefficient (95% CI) | <b>Motor scores<sup>+</sup></b><br>Coefficient (95% CI) |
|------------|------------|-------------------------------------------------------------|------------------------------------------------------------|---------------------------------------------------------|
| Univariate | Depression | -0.02 (-0.11, 0.08)                                         | -0.06 (-0.18, 0.06)                                        | -0.12 (-0.25, 0.01)                                     |
|            | Alcohol    | -0.07 (-0.17, 0.03)                                         | -0.03 (-0.16, 0.11)                                        | 0.01 (-0.13, 0.15)                                      |
| Adjusted   | Depression | 0.02 (-0.08, 0.13)                                          | -0.05 (-0.18, 0.07)                                        | -0.04 (-0.19, 0.10)                                     |
|            | Alcohol    | -0.06 (-0.17, 0.05)                                         | 0.01 (-0.12, 0.14)                                         | 0.05 (-0.10, 0.20)                                      |

Notes: Adjusted associations between proposed mediators and developmental domains were run using linear regression. Depression and alcohol were run separately in adjusted regression models. IPV sub-types, depression and alcohol dependence were included as continuous variables in all models.

Abbreviation: IPV = intimate partner violence.

<sup>#</sup>Adjusted for intimate partner violence, child sex, HIV exposure, length-for-age z-scores, weight-for-age z-scores and weight-for-length z-scores at 24 months.

<sup>^</sup>Adjusted for intimate partner violence, maternal education, recruitment site, weight-for-age z-score at birth, child sex and HIV exposure.

<sup>+</sup>Adjusted for intimate partner violence, child age at assessment and weight-for-length z-scores at 24 months.

STROBE Statement—Checklist of items that should be included in reports of *cohort studies*

|                              | Item No | Recommendation                                                                                                                                                                                                                                                                                                         | Page No                                      |
|------------------------------|---------|------------------------------------------------------------------------------------------------------------------------------------------------------------------------------------------------------------------------------------------------------------------------------------------------------------------------|----------------------------------------------|
| <b>Title and abstract</b>    | 1       | (a) Indicate the study's design with a commonly used term in the title or the abstract                                                                                                                                                                                                                                 | 1                                            |
|                              |         | (b) Provide in the abstract an informative and balanced summary of what was done and what was found                                                                                                                                                                                                                    | 2                                            |
| <b>Introduction</b>          |         |                                                                                                                                                                                                                                                                                                                        |                                              |
| Background/rationale         | 2       | Explain the scientific background and rationale for the investigation being reported                                                                                                                                                                                                                                   | 3-5                                          |
| Objectives                   | 3       | State specific objectives, including any prespecified hypotheses                                                                                                                                                                                                                                                       | 5                                            |
| <b>Methods</b>               |         |                                                                                                                                                                                                                                                                                                                        |                                              |
| Study design                 | 4       | Present key elements of study design early in the paper                                                                                                                                                                                                                                                                | 5                                            |
| Setting                      | 5       | Describe the setting, locations, and relevant dates, including periods of recruitment, exposure, follow-up, and data collection                                                                                                                                                                                        | 5/6                                          |
| Participants                 | 6       | (a) Give the eligibility criteria, and the sources and methods of selection of participants. Describe methods of follow-up<br>(b) For matched studies, give matching criteria and number of exposed and unexposed                                                                                                      | 6<br>NA                                      |
| Variables                    | 7       | Clearly define all outcomes, exposures, predictors, potential confounders, and effect modifiers. Give diagnostic criteria, if applicable                                                                                                                                                                               | 6-9                                          |
| Data sources/<br>measurement | 8*      | For each variable of interest, give sources of data and details of methods of assessment (measurement). Describe comparability of assessment methods if there is more than one group                                                                                                                                   | 6-9                                          |
| Bias                         | 9       | Describe any efforts to address potential sources of bias                                                                                                                                                                                                                                                              | 11                                           |
| Study size                   | 10      | Explain how the study size was arrived at                                                                                                                                                                                                                                                                              | 11                                           |
| Quantitative variables       | 11      | Explain how quantitative variables were handled in the analyses. If applicable, describe which groupings were chosen and why                                                                                                                                                                                           | 10-11                                        |
| Statistical methods          | 12      | (a) Describe all statistical methods, including those used to control for confounding<br>(b) Describe any methods used to examine subgroups and interactions<br>(c) Explain how missing data were addressed<br>(d) If applicable, explain how loss to follow-up was addressed<br>(e) Describe any sensitivity analyses | 10-11<br>N/A<br>Supplemental<br>Supplemental |
| <b>Results</b>               |         |                                                                                                                                                                                                                                                                                                                        |                                              |
| Participants                 | 13*     | (a) Report numbers of individuals at each stage of study—eg numbers potentially eligible, examined for eligibility, confirmed eligible, included in the study, completing follow-up, and analysed<br>(b) Give reasons for non-participation at each stage<br>(c) Consider use of a flow diagram                        | 11<br>11                                     |
| Descriptive data             | 14*     | (a) Give characteristics of study participants (eg demographic, clinical, social) and information on exposures and potential confounders<br>(b) Indicate number of participants with missing data for each variable of interest<br>(c) Summarise follow-up time (eg, average and total amount)                         | 12<br>Table 1                                |
| Outcome data                 | 15*     | Report numbers of outcome events or summary measures over time                                                                                                                                                                                                                                                         | 12, Table 2                                  |

|                                           |                          |    |                                                                                                                                                                                                                                                                                                                                                                                                               |                                              |
|-------------------------------------------|--------------------------|----|---------------------------------------------------------------------------------------------------------------------------------------------------------------------------------------------------------------------------------------------------------------------------------------------------------------------------------------------------------------------------------------------------------------|----------------------------------------------|
| 1<br>2<br>3<br>4<br>5<br>6<br>7<br>8<br>9 | Main results             | 16 | (a) Give unadjusted estimates and, if applicable, confounder-adjusted estimates and their precision (eg, 95% confidence interval). Make clear which confounders were adjusted for and why they were included<br>(b) Report category boundaries when continuous variables were categorized<br>(c) If relevant, consider translating estimates of relative risk into absolute risk for a meaningful time period | 12-13<br>Tables 3,4<br><br>7-8<br>Tables 1,2 |
| 10<br>11<br>12                            | Other analyses           | 17 | Report other analyses done—eg analyses of subgroups and interactions, and sensitivity analyses                                                                                                                                                                                                                                                                                                                | Supplemental tables                          |
| 13                                        | <b>Discussion</b>        |    |                                                                                                                                                                                                                                                                                                                                                                                                               |                                              |
| 14                                        | Key results              | 18 | Summarise key results with reference to study objectives                                                                                                                                                                                                                                                                                                                                                      | 13-14                                        |
| 15<br>16<br>17<br>18                      | Limitations              | 19 | Discuss limitations of the study, taking into account sources of potential bias or imprecision. Discuss both direction and magnitude of any potential bias                                                                                                                                                                                                                                                    | 16-17                                        |
| 19<br>20<br>21<br>22                      | Interpretation           | 20 | Give a cautious overall interpretation of results considering objectives, limitations, multiplicity of analyses, results from similar studies, and other relevant evidence                                                                                                                                                                                                                                    | 17                                           |
| 23<br>24                                  | Generalisability         | 21 | Discuss the generalisability (external validity) of the study results                                                                                                                                                                                                                                                                                                                                         | 16-17                                        |
| 25                                        | <b>Other information</b> |    |                                                                                                                                                                                                                                                                                                                                                                                                               |                                              |
| 26<br>27<br>28<br>29                      | Funding                  | 22 | Give the source of funding and the role of the funders for the present study and, if applicable, for the original study on which the present article is based                                                                                                                                                                                                                                                 | 1                                            |

\*Give information separately for exposed and unexposed groups.

**Note:** An Explanation and Elaboration article discusses each checklist item and gives methodological background and published examples of transparent reporting. The STROBE checklist is best used in conjunction with this article (freely available on the Web sites of PLoS Medicine at <http://www.plosmedicine.org/>, Annals of Internal Medicine at <http://www.annals.org/>, and Epidemiology at <http://www.epidem.com/>). Information on the STROBE Initiative is available at <http://www.strobe-statement.org>.
