# Supplementary material for: Maternal emotional and physical intimate partner violence and early child development: investigating mediators in a cross-sectional study in a South African birth cohort
Source: PubMed Central journal article supplement (PMC8557296; doi:10.1136/bmjopen-2020-046829), 2021-10-28
Supplement: bmjopen-2020-046829supp001.pdf [file bmjopen-2020-046829supp001.pdf]

**Supplemental Table 1.** Comparison of psychosocial, demographic and clinical data between children included in complete case developmental models and those who are not.

|                                                 | In Development models | Not in Development model | p-value |
|-------------------------------------------------|-----------------------|--------------------------|---------|
| <b>Intimate Partner Violence (IPV)</b>          |                       |                          |         |
| Emotional IPV score, median (IQR)               | 0 (0, 0)              | 0 (0, 0)                 | 0.669   |
| Physical IPV score, median (IQR)                | 0 (0, 0)              | 0 (0, 0)                 | 0.213   |
| Sexual IPV score, median (IQR)                  | 0 (0, 0)              | 0 (0, 0)                 | 0.160   |
| <b>Sociodemographics</b>                        |                       |                          |         |
| Maternal education (did not complete secondary) | 393 (63)              | 302 (58)                 | 0.132   |
| Mother employed                                 | 225 (41)              | 99 (51)                  | 0.022*  |
| Mother married/partnered                        | 268 (49)              | 99 (51)                  | 0.718   |
| <b>Household Income</b>                         |                       |                          |         |
| <R5000                                          | 445 (73)              | 122 (63)                 | 0.671   |
| >R5000                                          | 164 (27)              | 47 (24)                  |         |
| Recruitment site: TC Newman                     | 274 (44)              | 235 (45)                 | 0.586   |
| <b>Physical variables</b>                       |                       |                          |         |
| Birth weight z-score, median (IQR)              | -0.59 (-1.34, 0.16)   | -0.51 (-1.22, -0.00)     | 0.744   |
| Male sex                                        | 321 (51)              | 269 (52)                 | 0.774   |
| HIV exposed                                     | 153 (24)              | 94 (18)                  | 0.010*  |
| Length for age z-scores, median (IQR)           | -1.10 (-1.80, -0.34)  | -1.03 (-1.85, -0.28)     | 0.846   |
| Weight for age z-scores, median (IQR)           | -0.31 (-1.10, 0.43)   | -0.24 (-1.01, 0.40)      | 0.6682  |
| Weight for length z-scores, median (IQR)        | 0.28 (-0.48, 1.13)    | 0.43 (-0.40, 1.09)       | 0.7542  |
| <b>Psychosocial factors</b>                     |                       |                          |         |
| Depression score, median (IQR)                  | 0 (0, 3)              | 0 (0, 5)                 | 0.415   |
| Alcohol dependence score, median (IQR)          | 0 (0,0)               | 0 (0,0)                  | 0.068   |

Data are presented as n(%) or median IQR). Birthweight and HIV exposure collected at birth; all other variables collected at 2 years of child age. Abbreviation: IPV=intimate partner violence.

\*p<0.05; \*\*p<0.001

**Supplemental Table 2.** Univariate associations between intimate partner violence, covariates and proposed mediators and composite scores for developmental domains in the multiple-imputation analysis sample.

|                                              | Composite Cognitive   | Composite Language     | Composite Motor       |
|----------------------------------------------|-----------------------|------------------------|-----------------------|
|                                              | Unadjusted            | Unadjusted             | Unadjusted            |
|                                              | Coefficient (95% CI)  | Coefficient (95% CI)   | Coefficient (95% CI)  |
| <b>Intimate Partner Violence (IPV)</b>       |                       |                        |                       |
| Emotional IPV score                          | -0.33 (-0.60, -0.06)* | -0.34 (-0.68, -0.01)*  | -0.51 (-0.86, -0.16)* |
| Physical IPV score                           | -0.19 (-0.43, 0.05)   | -0.20 (-0.50, 0.11)    | -0.39 (-0.70, -0.09)* |
| Sexual IPV score                             | -0.13 (-0.98, 0.71)   | -0.16 (-1.36, 1.04)    | -0.41 (-1.58, 0.75)   |
| <b>Sociodemographics</b>                     |                       |                        |                       |
| Maternal education (not completed secondary) | -1.31 (-2.69, 0.07)   | -3.20 (-4.94, -1.45)** | -1.45 (-3.30, 0.40)   |
| Mother employed                              | 0.48 (-1.02, 1.99)    | 0.13 (-1.81, 2.07)     | 0.41 (-1.55, 2.38)    |
| Mother married/partnered                     | -0.59 (-2.07, 0.89)   | 0.26 (-1.64, 2.16)     | 0.15 (-1.88, 2.18)    |
| Household Income                             |                       |                        |                       |
| >R5000                                       | 0.73 (-0.92, 2.38)    | 1.00 (-1.14, 3.13)     | 1.96 (-0.28, 4.20)    |
| TC Newman                                    | 1.20 (-0.15, 2.54)    | 3.12 (1.41, 4.84)**    | 0.89 (-0.91, 2.68)    |
| <b>Physical variables</b>                    |                       |                        |                       |
| Birth weight z-score                         | 0.44 (-0.15, 1.03)    | 0.68 (-0.07, 1.42)     | 0.58 (-0.21, 1.36)    |
| Male                                         | -1.67 (-3.01, -0.33)* | -4.07 (-5.77, -2.37)** | -1.70 (-3.49, 0.09)   |
| Child age (months)                           | -0.95 (-2.24, 0.33)   | -0.12 (-1.77, 1.53)    | -2.81 (-4.50, -1.11)* |
| HIV exposed                                  | -1.70 (-3.29, -0.10)* | -3.77 (-5.82, -1.72)** | -0.59 (-2.72, 1.54)   |
| Length for age z-score                       | 0.92 (0.33, 1.52)*    | 0.67 (-0.09, 1.42)     | 0.26 (-0.54, 1.06)    |
| Weight for age z-score                       | 0.84 (0.26, 1.43)*    | 0.64 (-0.10, 1.37)     | 0.82 (0.04, 1.60)*    |
| Weight for length z-score                    | 0.50 (-0.08, 1.08)    | 0.39 (-0.34, 1.11)     | 0.88 (0.10, 1.66)*    |
| <b>Proposed Psychosocial mediators</b>       |                       |                        |                       |
| Depression score                             | -0.02 (-0.12, 0.08)   | -0.06 (-0.18, 0.07)    | -0.11 (-0.24, 0.02)   |
| Alcohol dependence score                     | -0.08 (-0.19, 0.03)   | -0.03 (-0.17, 0.11)    | 0.03 (-0.11, 0.16)    |

Birthweight and HIV exposure collected at birth; all other variables collected at 2 years of child age. IPV sub-types, depression and alcohol dependence were included as continuous variables in all models.

Abbreviation: IPV= intimate partner violence.

\*p<0.05, \*\*p<0.001

**Supplemental Table 3.** Multivariable linear regression demonstrating the association of intimate partner violence with composite scores for developmental domains in the multiple-imputation analysis sample.

|                     | Cognitive scores      | Language scores      | Motor scores          |                       |
|---------------------|-----------------------|----------------------|-----------------------|-----------------------|
|                     | Adjusted#             | Adjusted^            | Adjusted+             | Adjusted+             |
|                     | Coefficient (95% CI)  | Coefficient (95% CI) | Coefficient (95% CI)  | Coefficient (95% CI)  |
| Emotional IPV score | -0.30 (-0.57, -0.03)* | -0.35 (-0.68, -0.01) | -0.52 (-0.87, -0.17)* |                       |
| Physical IPV score  |                       |                      |                       | -0.39 (-0.70, -0.09)* |

Adjusted models were run only where IPV sub-type was associated (p<0.05) with outcome explored in bivariate analyses. For cognitive and language scores, only emotional IPV was associated in bivariate analyses and therefore run in multivariable models. Due to collinearity, emotional and physical IPV were run in separate multivariable models for motor development. Adjusted models were run including same covariates as the complete case analysis, as noted below. IPV sub-types, depression and alcohol dependence were included as continuous variables in all models.

Abbreviations: IPV=intimate partner violence.

\*p<0.05; \*\*p<0.001

#Adjusted for child sex, HIV exposure, length-for-age z-scores, weight-for-age z-scores and weight-for-length z-scores at 24 months.

^Adjusted for maternal education, recruitment site, weight-for-age z-score at birth, child sex and HIV exposure.

+Adjusted for child age at assessment and weight-for-length z-scores at 24 months.

**Supplemental Table 4.** Univariate associations between proposed mediators and intimate partner violence in complete case sample.

|                          | <b>Emotional IPV</b><br>Coefficient (95% CI) | <b>Physical IPV</b><br>Coefficient (95% CI) |
|--------------------------|----------------------------------------------|---------------------------------------------|
| Depression score         | 1.01 (0.80, 1.22)**                          | 0.68 (0.49, 0.87)**                         |
| Alcohol dependence score | 0.34 (0.13, 0.56)*                           | 0.30 (0.12, 0.49)*                          |

IPV sub-types, depression and alcohol dependence were included as continuous variables in all models.

Abbreviation: IPV = intimate partner violence.

\*p<0.05, \*\*p<0.001

**Supplemental Table 5.** Univariate and adjusted associations between proposed mediators and developmental outcomes in complete case sample.

|            |            | <b>Cognitive scores<sup>#</sup></b><br>Coefficient (95% CI) | <b>Language scores<sup>^</sup></b><br>Coefficient (95% CI) | <b>Motor scores<sup>+</sup></b><br>Coefficient (95% CI) |
|------------|------------|-------------------------------------------------------------|------------------------------------------------------------|---------------------------------------------------------|
| Univariate | Depression | -0.02 (-0.11, 0.08)                                         | -0.06 (-0.18, 0.06)                                        | -0.12 (-0.25, 0.01)                                     |
|            | Alcohol    | -0.07 (-0.17, 0.03)                                         | -0.03 (-0.16, 0.11)                                        | 0.01 (-0.13, 0.15)                                      |
| Adjusted   | Depression | 0.02 (-0.08, 0.13)                                          | -0.05 (-0.18, 0.07)                                        | -0.04 (-0.19, 0.10)                                     |
|            | Alcohol    | -0.06 (-0.17, 0.05)                                         | 0.01 (-0.12, 0.14)                                         | 0.05 (-0.10, 0.20)                                      |

Notes: Adjusted associations between proposed mediators and developmental domains were run using linear regression. Depression and alcohol were run separately in adjusted regression models. IPV sub-types, depression and alcohol dependence were included as continuous variables in all models.

Abbreviation: IPV = intimate partner violence.

<sup>#</sup>Adjusted for intimate partner violence, child sex, HIV exposure, length-for-age z-scores, weight-for-age z-scores and weight-for-length z-scores at 24 months.

<sup>^</sup>Adjusted for intimate partner violence, maternal education, recruitment site, weight-for-age z-score at birth, child sex and HIV exposure.

<sup>+</sup>Adjusted for intimate partner violence, child age at assessment and weight-for-length z-scores at 24 months.
